# Supplementary material for: Antibacterial Activity of Endophytic Actinomycetes Isolated from the Medicinal Plant Vochysia divergens (Pantanal, Brazil)
Source: Front Microbiol. 2017 Sep 6;8:1642. doi: 10.3389/fmicb.2017.01642 (PMC5592219; doi:10.3389/fmicb.2017.01642)
Supplement: Supplementary file 1 [file DataSheet1.DOCX]

**Supplementary Information**

**Antibacterial activity of endophytic actinomycetes isolated from the medicinal plant *Vochysia divergens* (Pantanal, Brazil)**

Francielly Maria Wilke Ramos Gos1#, Daiani Cristina Savi2#, Khaled A. Shaaban3,4#, Jon S. Thorson3,4, Rodrigo Aluizio2, Yvelise Maria Possiede5, Jürgen Rohr3* and Chirlei Glienke2*

1Federal University of Paraná, Department of Basic Pathology, Curitiba, Brazil. 2Federal University of Paraná, Department of Genetics, Box 19031, 81531–990, Curitiba, PR, Brazil. 3Department of Pharmaceutical Sciences, College of Pharmacy, University of Kentucky, Lexington, Kentucky 40536, United States. 4Center for Pharmaceutical Research and Innovation, College of Pharmacy, University of Kentucky, Lexington, Kentucky 40536, United States. 5Federal University of Mato Grosso do Sul, Department of Biology, Box: 79070900, Campo Grande, MS, Brazil

#Authors contributed equally to this work.

*Corresponding author: Chirlei Glienke, +5533611562, chglienke@gmail.com; Jürgen Rohr, +1 859 323 5031, jrohr2@email.uky.edu;

**Running title:** Antibacterial activity of endophytic actinomycetes

| **Contents** | **Page** | |
| --- | --- | --- |
| **Figure S1-**Inhibition zone (mm) of Methicillin-resistant *S. aureus (*MRSA) by extracts from endophytic actinomycetes in two media (SG and R5A) at two temperatures (28°C and 36°C). | | 3 |
| **Figure S2-**Inhibition zone (mm) of *Escherichia coli* by extracts from endophytic actinomycetes in two media (SG and R5A) at two temperatures (28°C and 36°C). | | 4 |
| **Figure S3-**Inhibition zone (mm) of *Pseudomonas aeruginosa* by extracts from endophytic actinomycetes in two media (SG and R5A) at two temperatures (28°C and 36°C) | | 4 |
| **Figure 4-**Inhibition zone (mm) of *Acinetobacter baumannii* by extracts from endophytic actinomycetes in two media (SG and R5A) at two temperatures (28°C and 36°C). | | 5 |
| **Figure S5-**Inhibition zone (mm) of *Candida albicans* by extracts from endophytic actinomycetes in two media (SG and R5A) at two temperatures (28°C and 36°C). | | 5 |
| **Figure S6-**Inhibition zone (mm) of *Enterobacter cloacae* producer enzyme VIM (Verona integron-encoded metallo-β-lactamase) by extracts from endophytic actinomycetes in two media (SG and R5A) at two temperatures (28°C and 36°C). | | 6 |
| **Figure S7-**Inhibition zone (mm) of *Stenotrophomonas maltophilia* by extracts from endophytic actinomycetes in two media (SG and R5A) and two temperatures (28°C and 36°C). | | 6 |
| **Figure S8-**Inhibition zone (mm) of *Klebissiella pneumoniae* producer enzyme KPC (*K. pneumoniae* carbapemase) by extracts from endophytic actinomycetes in two media (SG and R5A) at two temperatures (28°C and 36°C) | | 7 |
| **Firure S9-** Work-up scheme of the metabolites produced by LGMB491 | | 8 |
| **Figure S10-** HPLC/UV analyses of 1-acetyl-β-carboline (1) | | 9 |
| **Figure S11-** HPLC/MS analyses of 1-acetyl-β-carboline (1) | | 10 |
| **Figure S12-** 1H NMR spectrum (DMSO-*d*6, 400 MHz) of 1-acetyl-β-carboline (**1**) | | 11 |
| **Figure S13-** 13C NMR spectrum (DMSO-*d*6, 100 MHz) of 1-acetyl-β-carboline (**1**) | | 12 |
| **Figure S14-** HPLC/UV analyses of indole-3-carbaldehyde (**2**) | | 13 |
| **Figure S15-** HPLC/MS analyses of indole-3-carbaldehyde (**2**) | | 14 |
| **Figure S16-** 1H NMR spectrum (CD3OD, 400 MHz) of indole-3-carbaldehyde (**2**) | | 15 |
| **Figure S17-** 13C NMR spectrum (CD3OD, 100 MHz) of indole-3-carbaldehyde (**2**) | | 16 |
| **Figure S18-** HPLC/UV analyses of tryptophol (**3**) | | 17 |
| **Figure S19-** HPLC/MS analyses of tryptophol (**3**) | | 18 |
| **Figure S20-** 1H NMR spectrum (CD3OD, 400 MHz) of tryptophol (**3**) | | 19 |
| **Figure S21-** 13C NMR spectrum (CD3OD, 100 MHz) of tryptophol (**3**) | | 20 |
| **Figure S22-** HPLC/UV analyses of 3-(hydroxyacetyl)-indole (**4**) | | 21 |
| **Figure S23-** HPLC/MS analyses of 3-(hydroxyacetyl)-indole (**4**) | | 22 |
| **Figure S24-** 1H NMR spectrum (CD3OD, 400 MHz) of 3-(hydroxyacetyl)-indole (**4**) | | 23 |
| **Figure S25-** 13C NMR spectrum (CD3OD, 100 MHz) of 3-(hydroxyacetyl)-indole (**4**) | | 24 |
| **Figure S26-** HPLC/UV analyses of brevianamide F (**5**) | | 25 |
| **Figure S27-** HPLC/MS analyses of brevianamide F (**5**) | | 26 |
| **Figure S28-** 1H NMR spectrum (CD3OD, 400 MHz) of brevianamide F (**5**) | | 27 |
| **Figure S29-** 13C NMR spectrum (CD3OD, 100 MHz) of brevianamide F (**5**) | | 28 |
| **Figure S30-** HPLC/UV analyses of cyclo-(l-Pro-l-Phe) (**6**) | | 29 |
| **Figure S31-** HPLC/MS analyses of cyclo-(l-Pro-l-Phe) (**6**) | | 30 |
| **Figure S32-** 1H NMR spectrum (CD3OD, 400 MHz) of cyclo-(l-Pro-l-Phe) (**6**) | | 31 |
| **Figure S33-** 13C NMR spectrum (CD3OD, 100 MHz) of cyclo-(l-Pro-l-Phe) (**6**) | | 32 |
| **Figure S34-** HPLC/UV analyses of cyclo-(l-Pro-l-Tyr) (**7**) | | 33 |
| **Figure S35-** HPLC/MS analyses of cyclo-(l-Pro-l-Tyr) (**7**) | | 34 |
| **Figure S36-** 1H NMR spectrum (CD3OD, 400 MHz) of cyclo-(l-Pro-l-Tyr) (**7**) | | 35 |
| **Figure S37-** 13C NMR spectrum (CD3OD, 100 MHz) of cyclo-(l-Pro-l-Tyr) (**7**) | | 36 |
| **Figure S38-** HPLC/MS analyses of cyclo-(l-Pro-l-Leu) (**8**) | | 37 |
| **Figure S39-** 1H NMR spectrum (CD3OD, 400 MHz) of cyclo-(l-Pro-l-Leu) (**8**) | | 38 |
| **Figure S40-** 13C NMR spectrum (CD3OD, 100 MHz) of cyclo-(l-Pro-l-Leu) (**8**) | | 39 |
| **Figure S41-** HPLC/MS analyses of cyclo-(l-Val-l-Phe) (**9**) | | 40 |
| **Figure S42-** 1H NMR spectrum (CD3OD, 400 MHz) of cyclo-(l-Val-l-Phe) (**9**) | | 41 |
| **Figure S43-** 13C NMR spectrum (CD3OD, 400 MHz) of cyclo-(l-Val-l-Phe) (**9**) | | 42 |
| **Table S1**- Similarity percentage matrix for the gene 16S rRNA, of LGMB466 and 487- *Actinomadura* sp | | 43 |
| **Table S2**- Similarity percentage matrix for the gene 16S rRNA, of LGMB491-  *Aeromicrobium* sp. | | 49 |
| **Table S3**- Similarity percentage matrix for the gene 16S rRNA, of LGMB471-  *Microbacterium* sp | | 50 |
| **Table S4**- Similarity percentage matrix for the gene 16S rRNA, of LGMB461 and 465- *Microbispora* sp. | | 51 |
| **Table S5**- Similarity percentage matrix for the gene 16S rRNA, of LGMB485- *Micrococcus* sp | | 52 |
| **Table S6**- Similarity percentage matrix for the gene 16S rRNA, of LGMB482- *Sphaerisporangium* sp. | | 53 |
| **Table S7**- Similarity percentage matrix for the gene 16S rRNA, of LGMB483- *Streptomyces* sp | | 52 |
| **Table S8**- Similarity percentage matrix for the gene 16S rRNA, of LGMB479- *Williamsia* sp | | 53 |
| **Table S9**. Dry weight obtained from extracts of endophytic actinomycetes in two media (SG and R5A) and two temperatures (28 °C and 36 °C) | | 56 |

Methicillin-sensitive *Staphylococcus aureus*(MSSA)


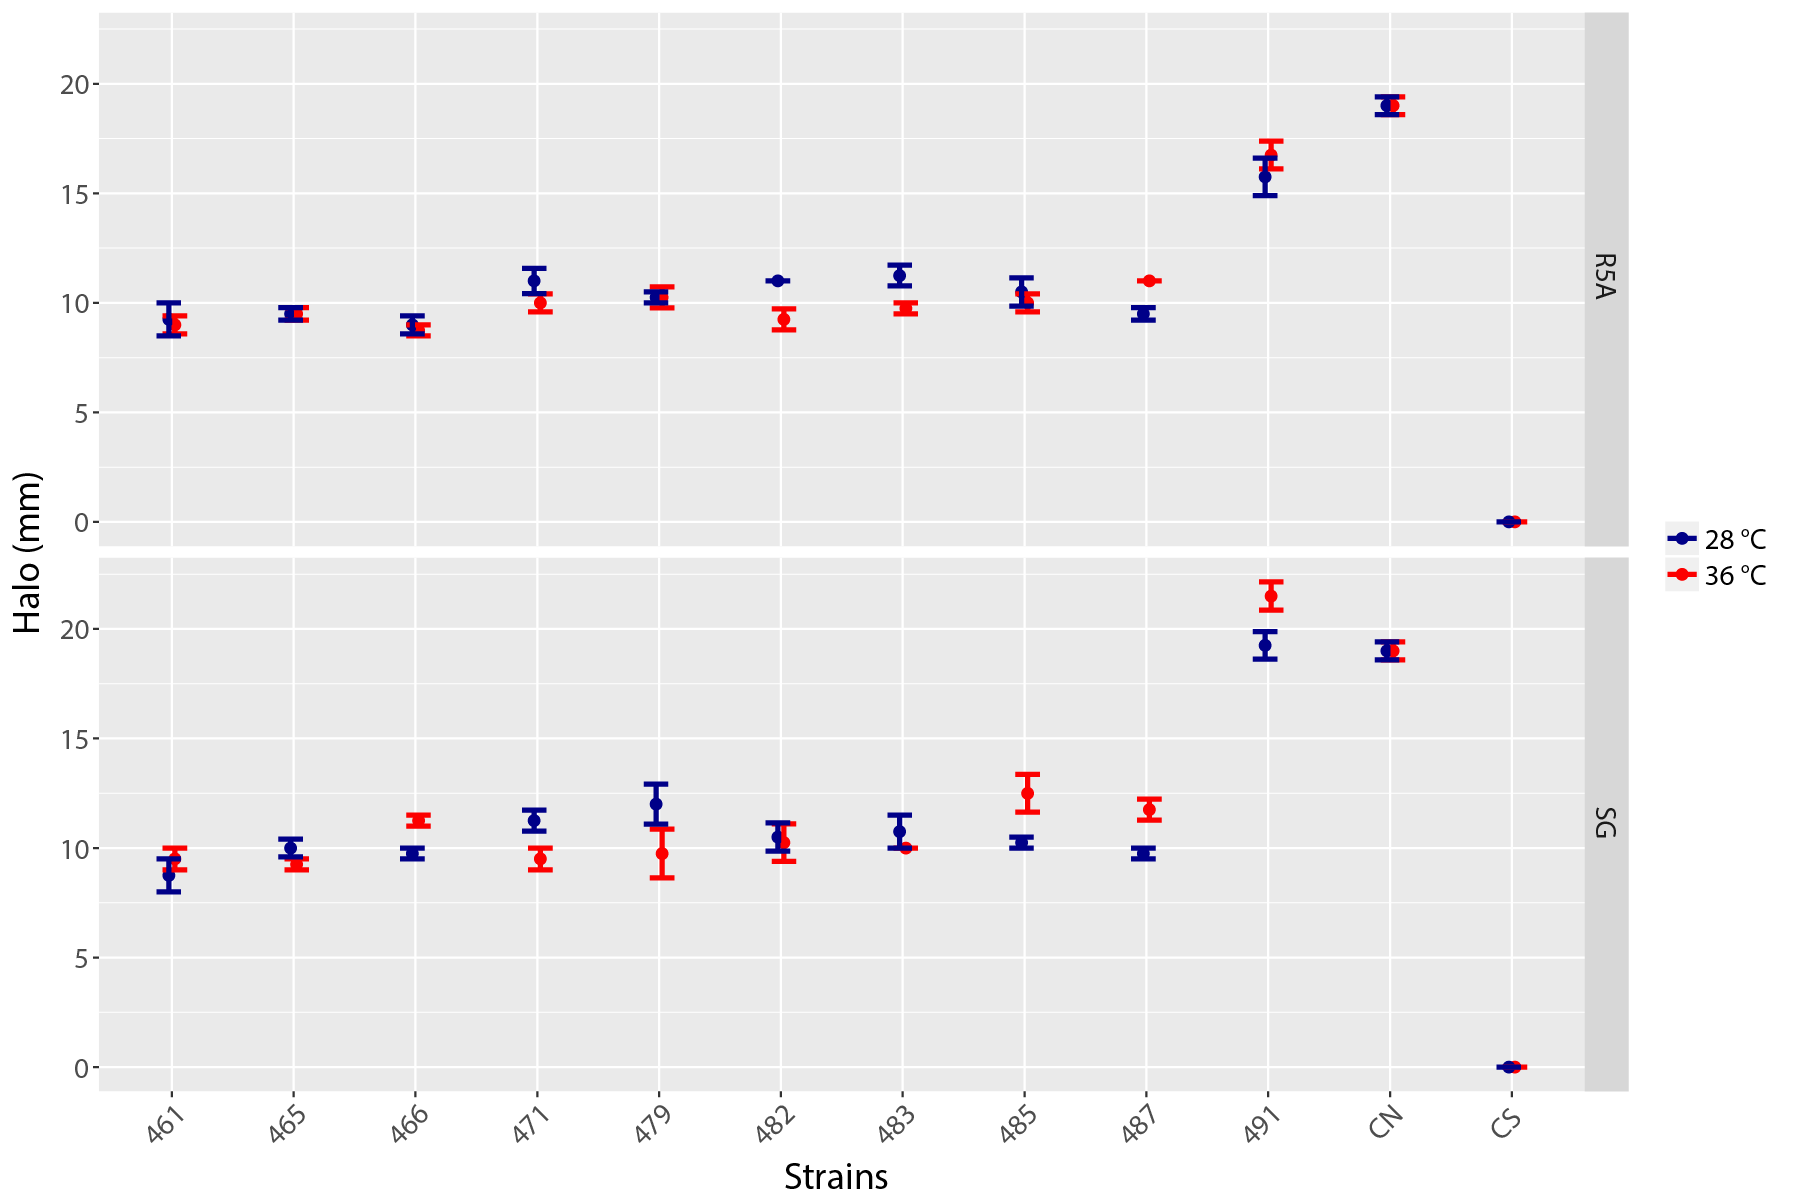


Methicillin-resistant *Staphylococcus aureus* (MRSA)


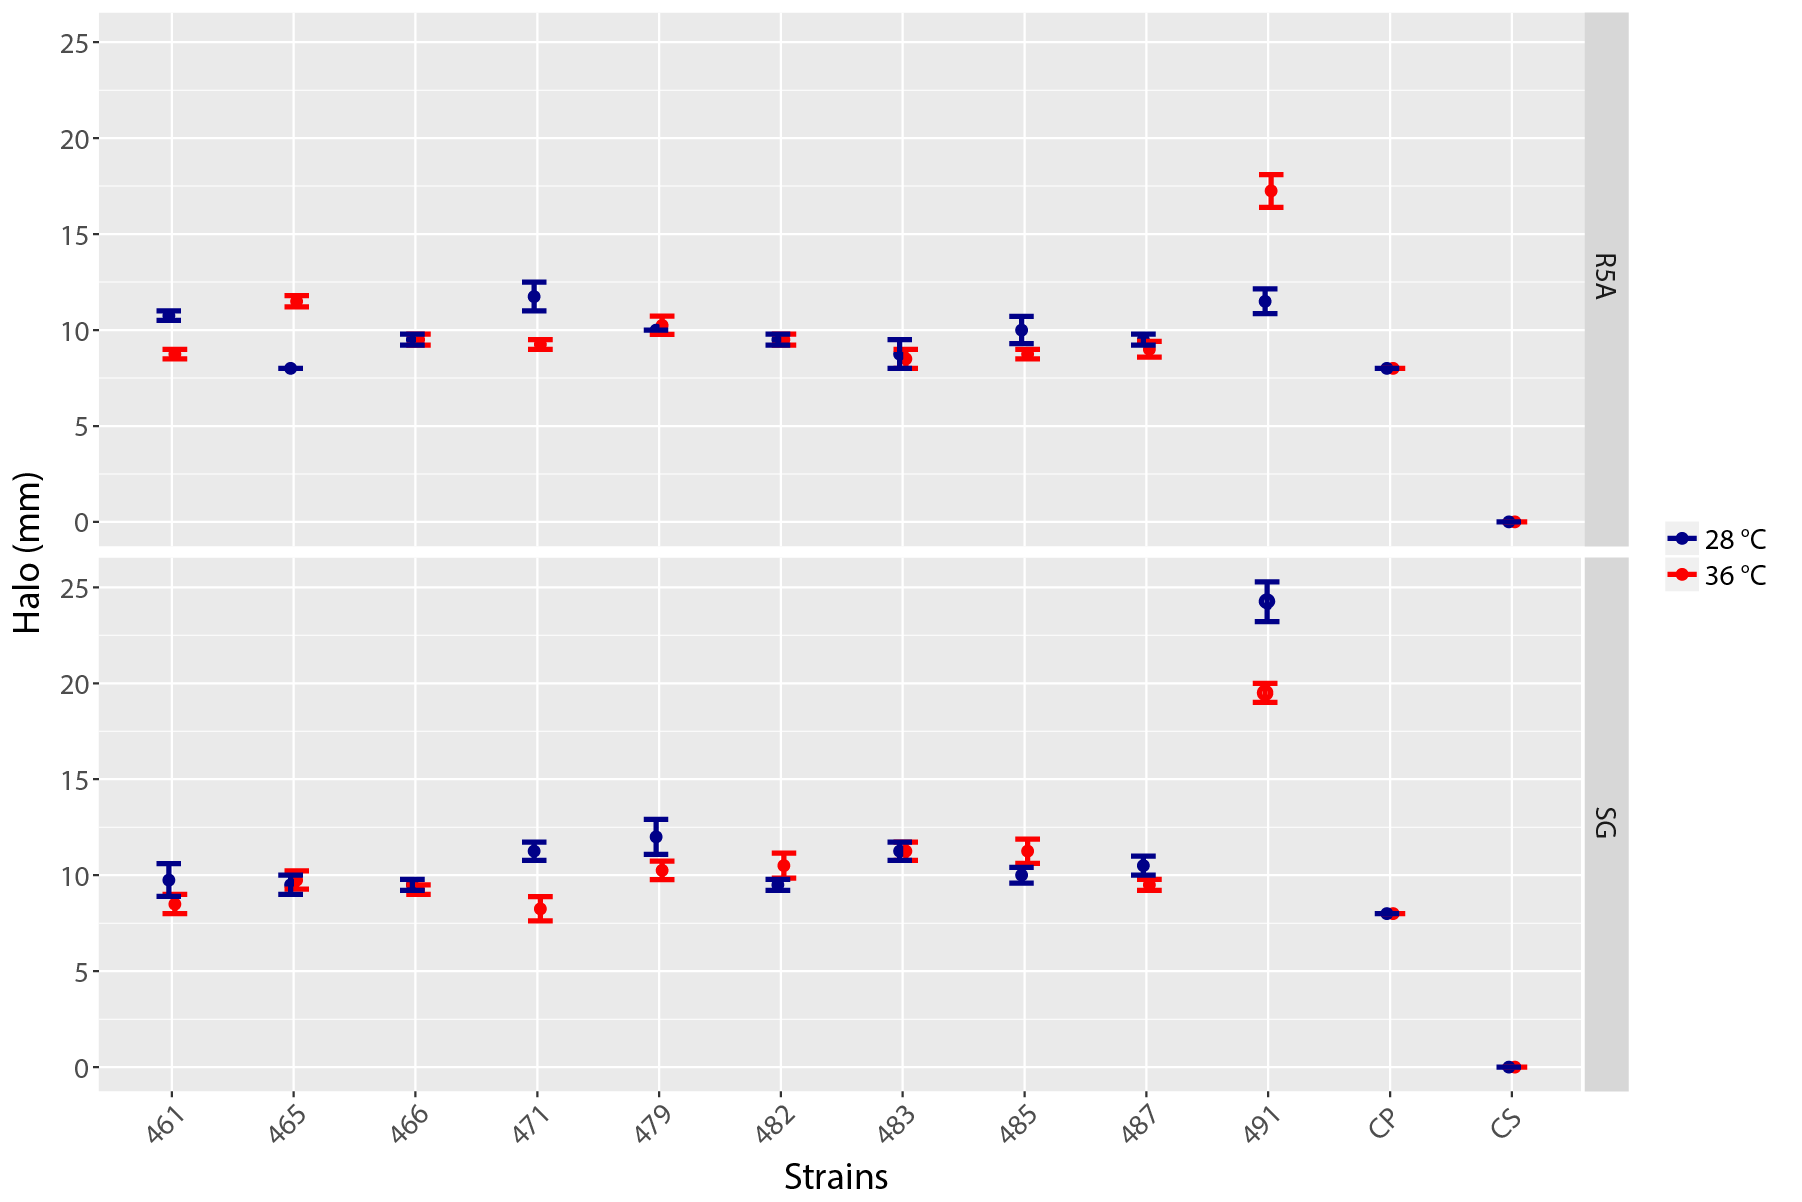


CS

CN

**Figure S1-**Inhibition zone (mm) of Methicillin-resistant *S. aureus (*MRSA) by extracts from endophytic actinomycetes in two media (SG and R5A) at two temperatures (28 °C and 36 °C).

Mean (±SD), CS: Methanol, CN: negative control


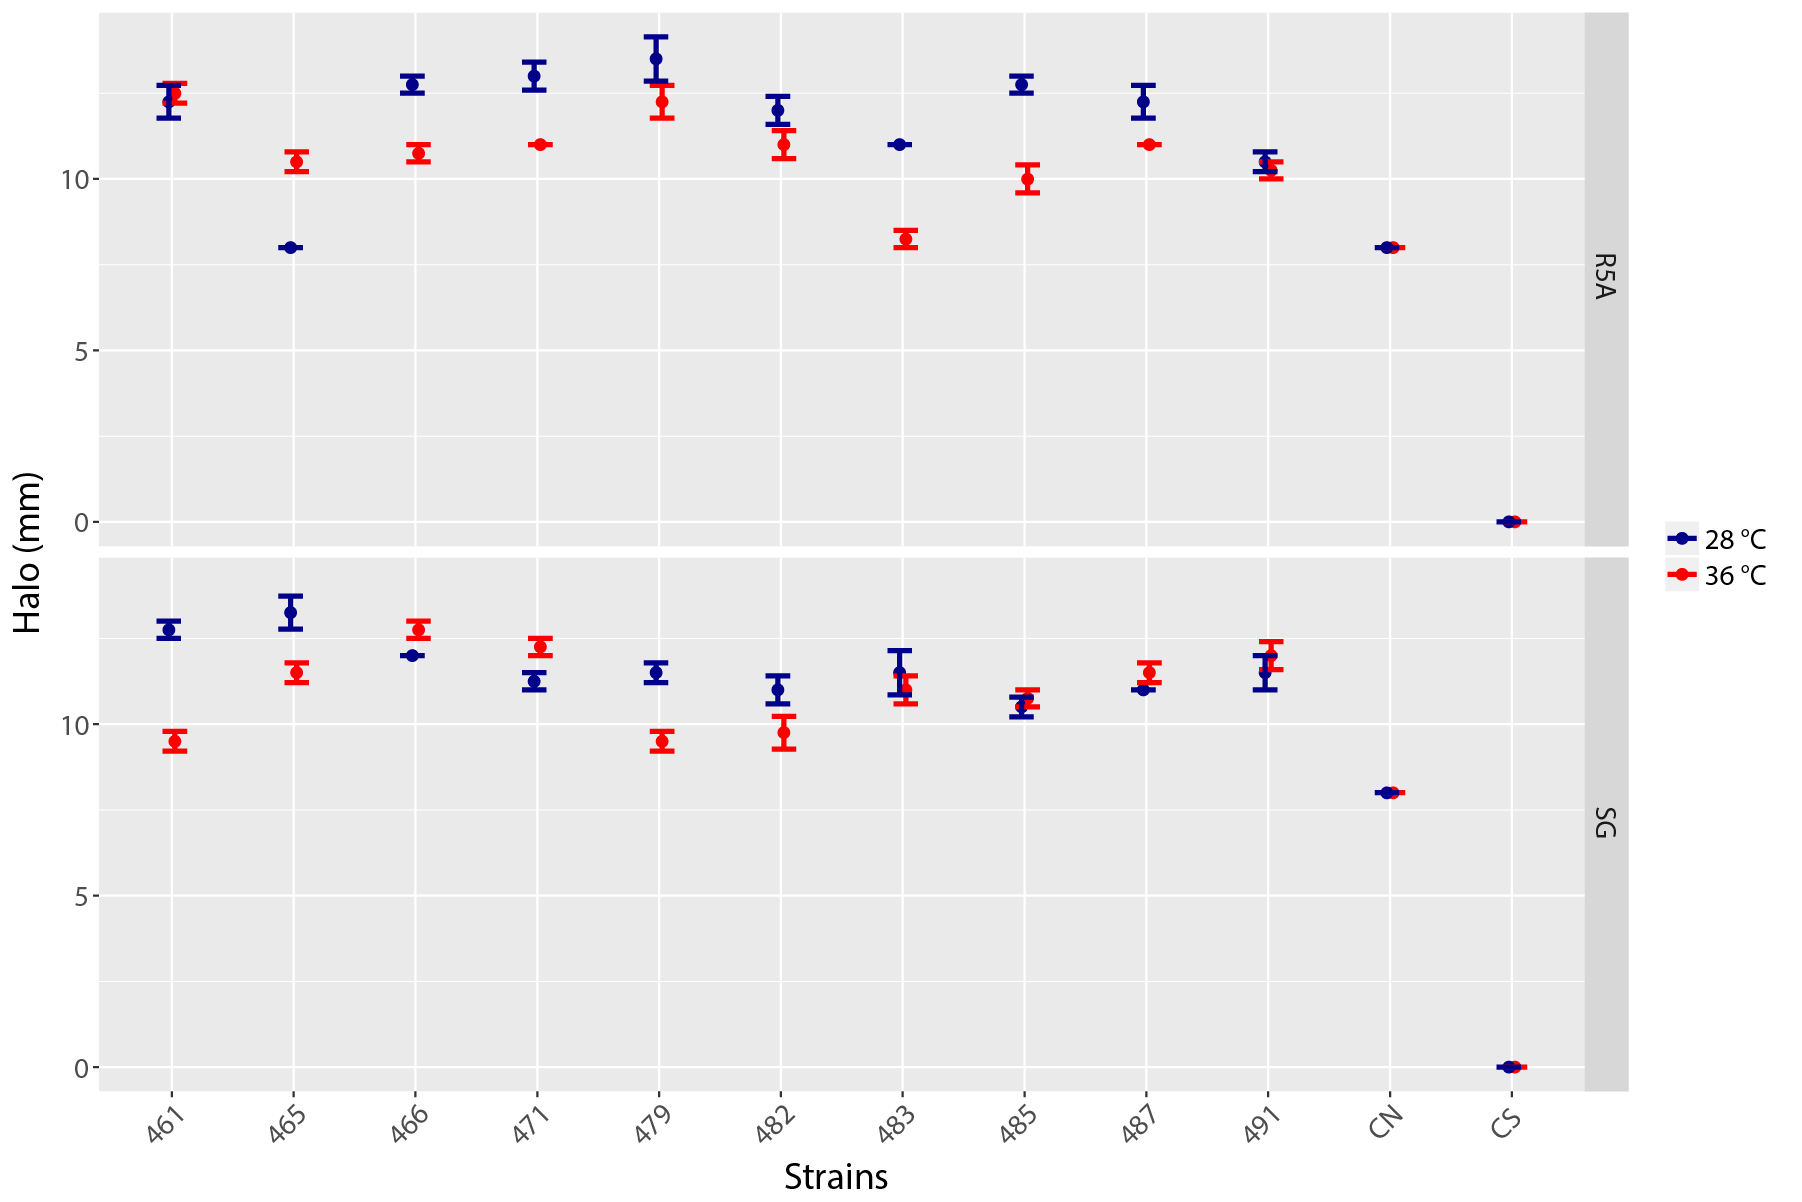


*Escherichia coli*

**Figure S2-**Inhibition zone (mm) of *Escherichia coli* by extracts from endophytic actinomycetes in two media (SG and R5A) at two temperatures (28 °C and 36 °C).

Mean (±SD), CS: Methanol, CN: negative control

*Pseudomonas aeruginosa*


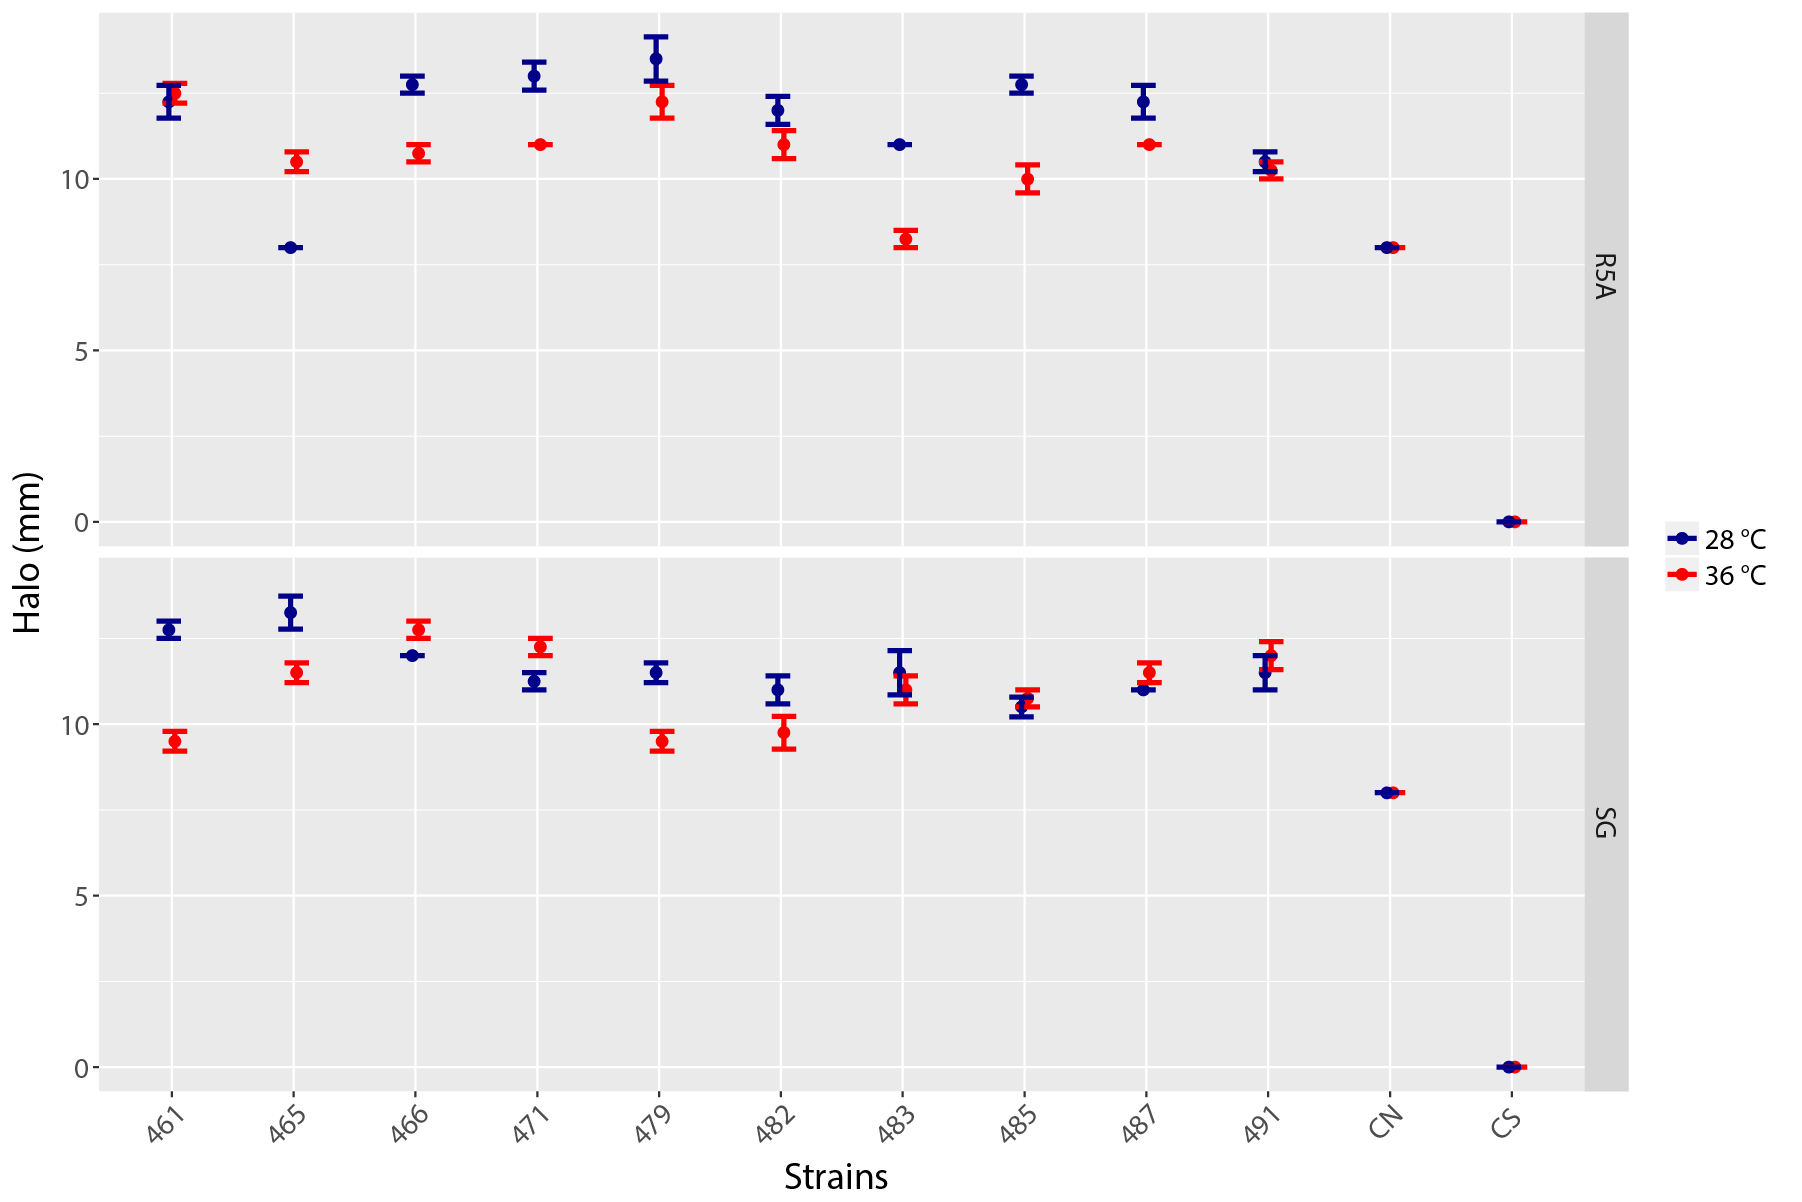


**Figure S3-**Inhibition zone (mm) of *Pseudomonas aeruginosa* by extracts from endophytic actinomycetes in two media (SG and R5A) at two temperatures (28 °C and 36 °C).

Mean (±SD), CS: Methanol, CN: negative control


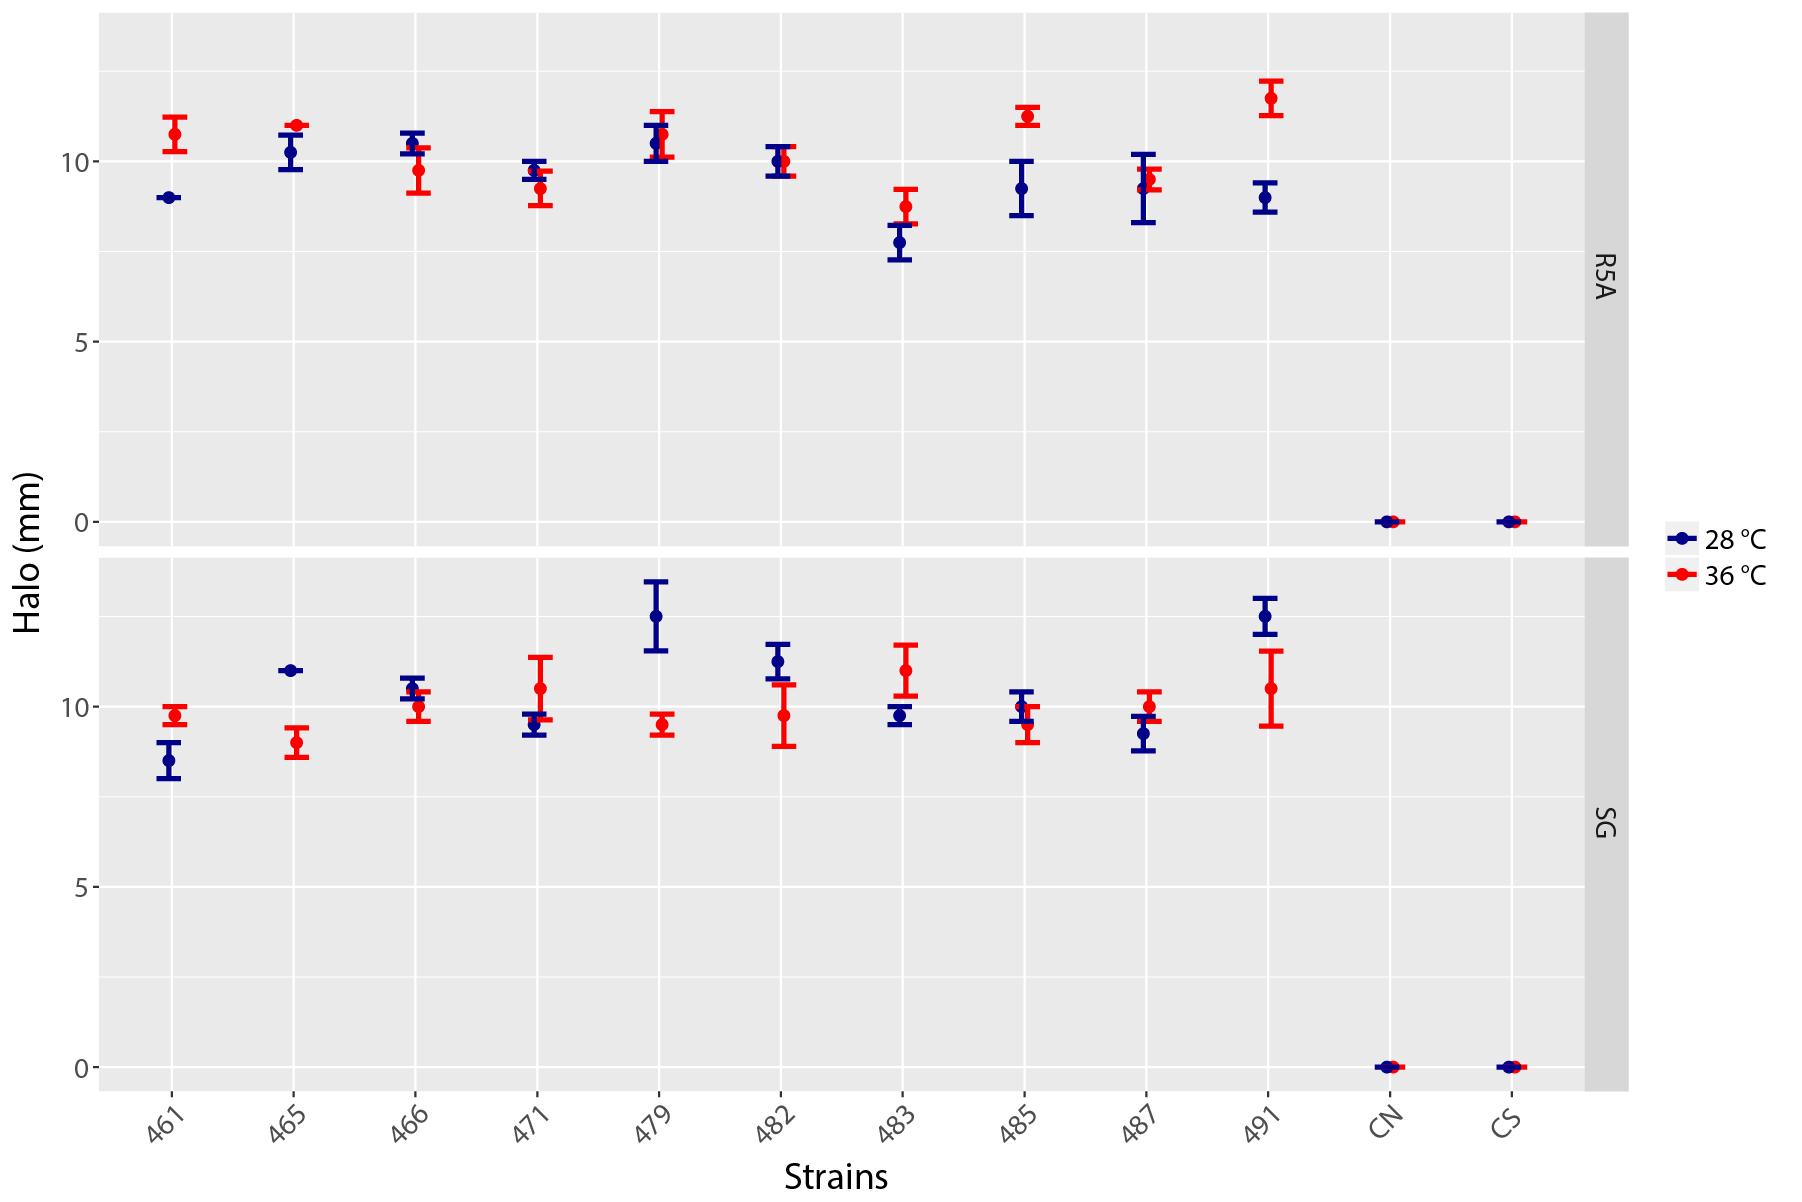


*Acinetobacter baumannii*

**Figure S4-**Inhibition zone (mm) of *Acinetobacter baumannii* by extracts from endophytic actinomycetes in two media (SG and R5A) at two temperatures (28 °C and 36 °C).

Mean (±SD), CS: Methanol, CN: negative control

*Candida albicans*


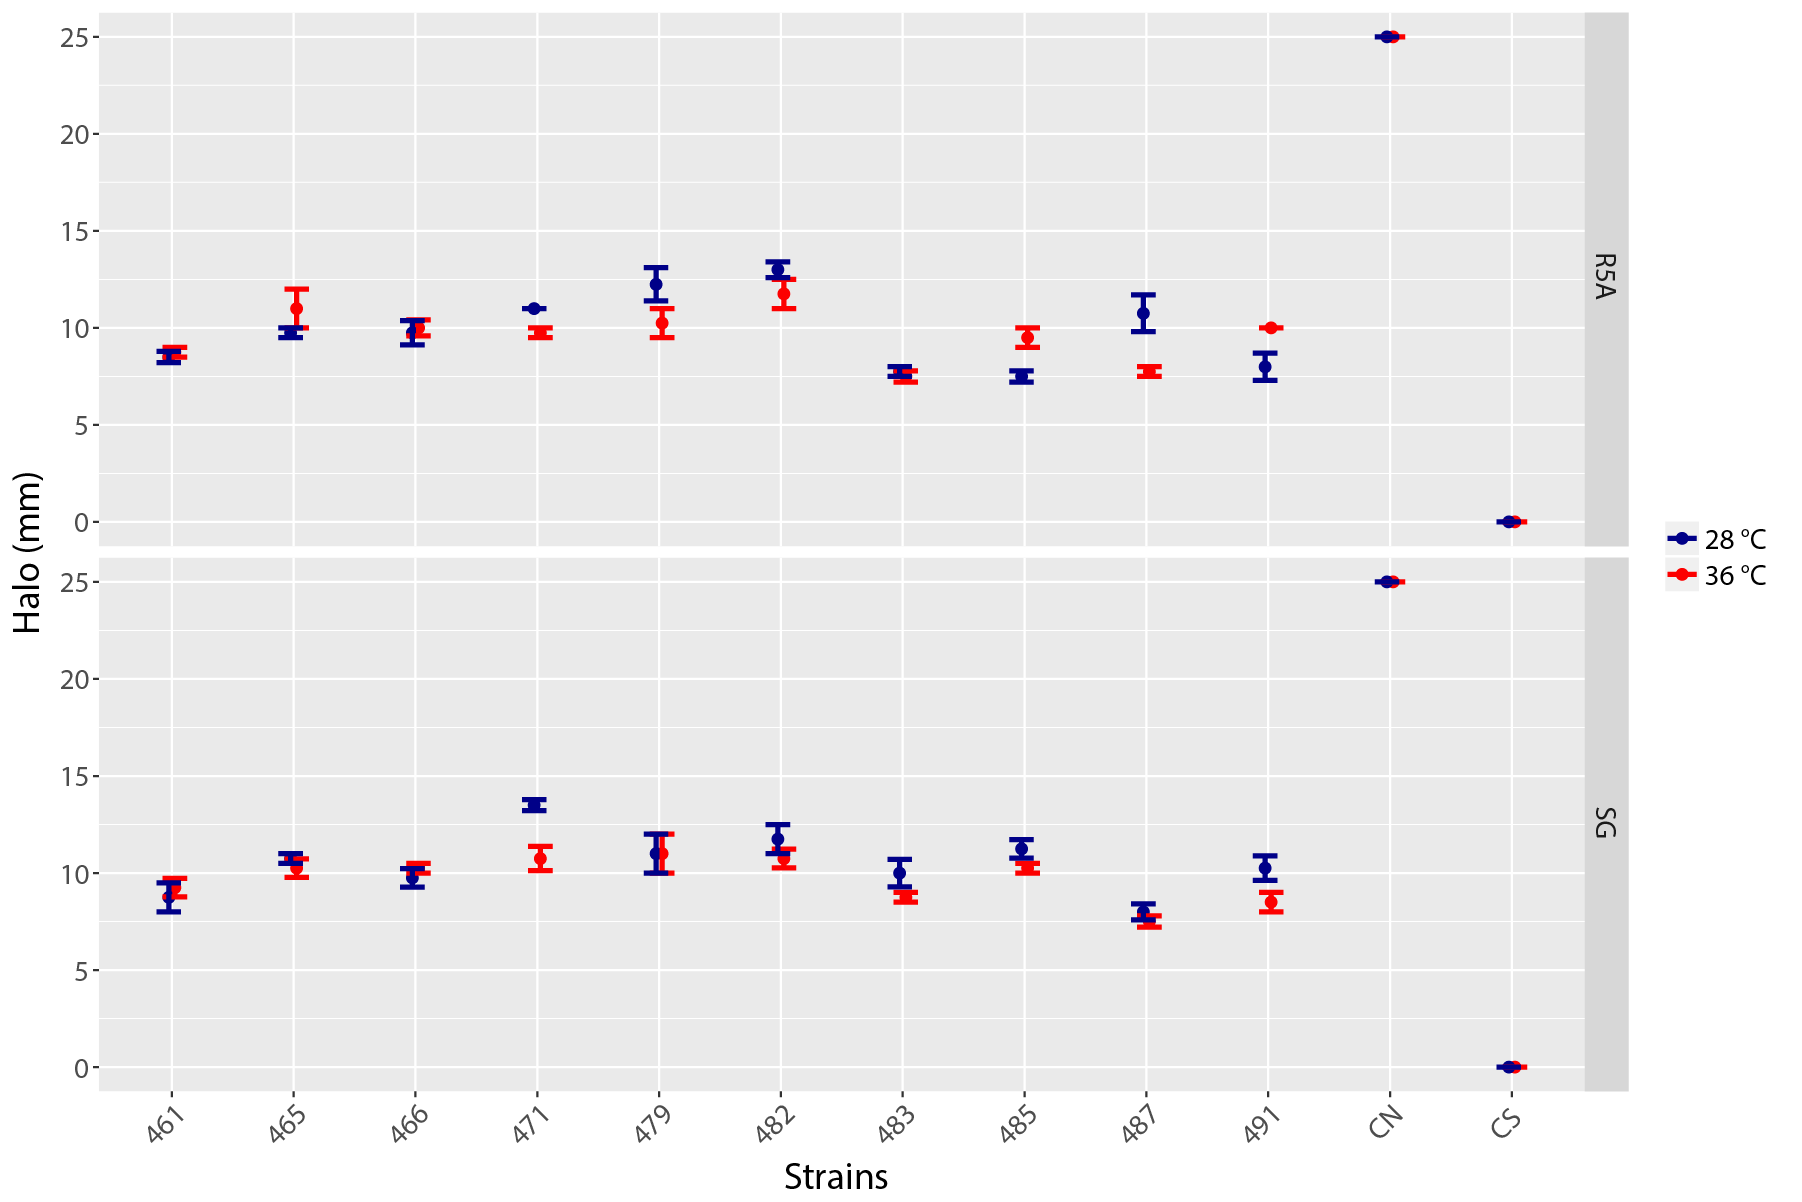


**Figure S5-**Inhibition zone (mm) of *Candida albicans* by extracts from endophytic actinomycetes in two media (SG and R5A) at two temperatures (28 °C and 36 °C).

Mean (±SD), CS: Methanol, CN: negative control


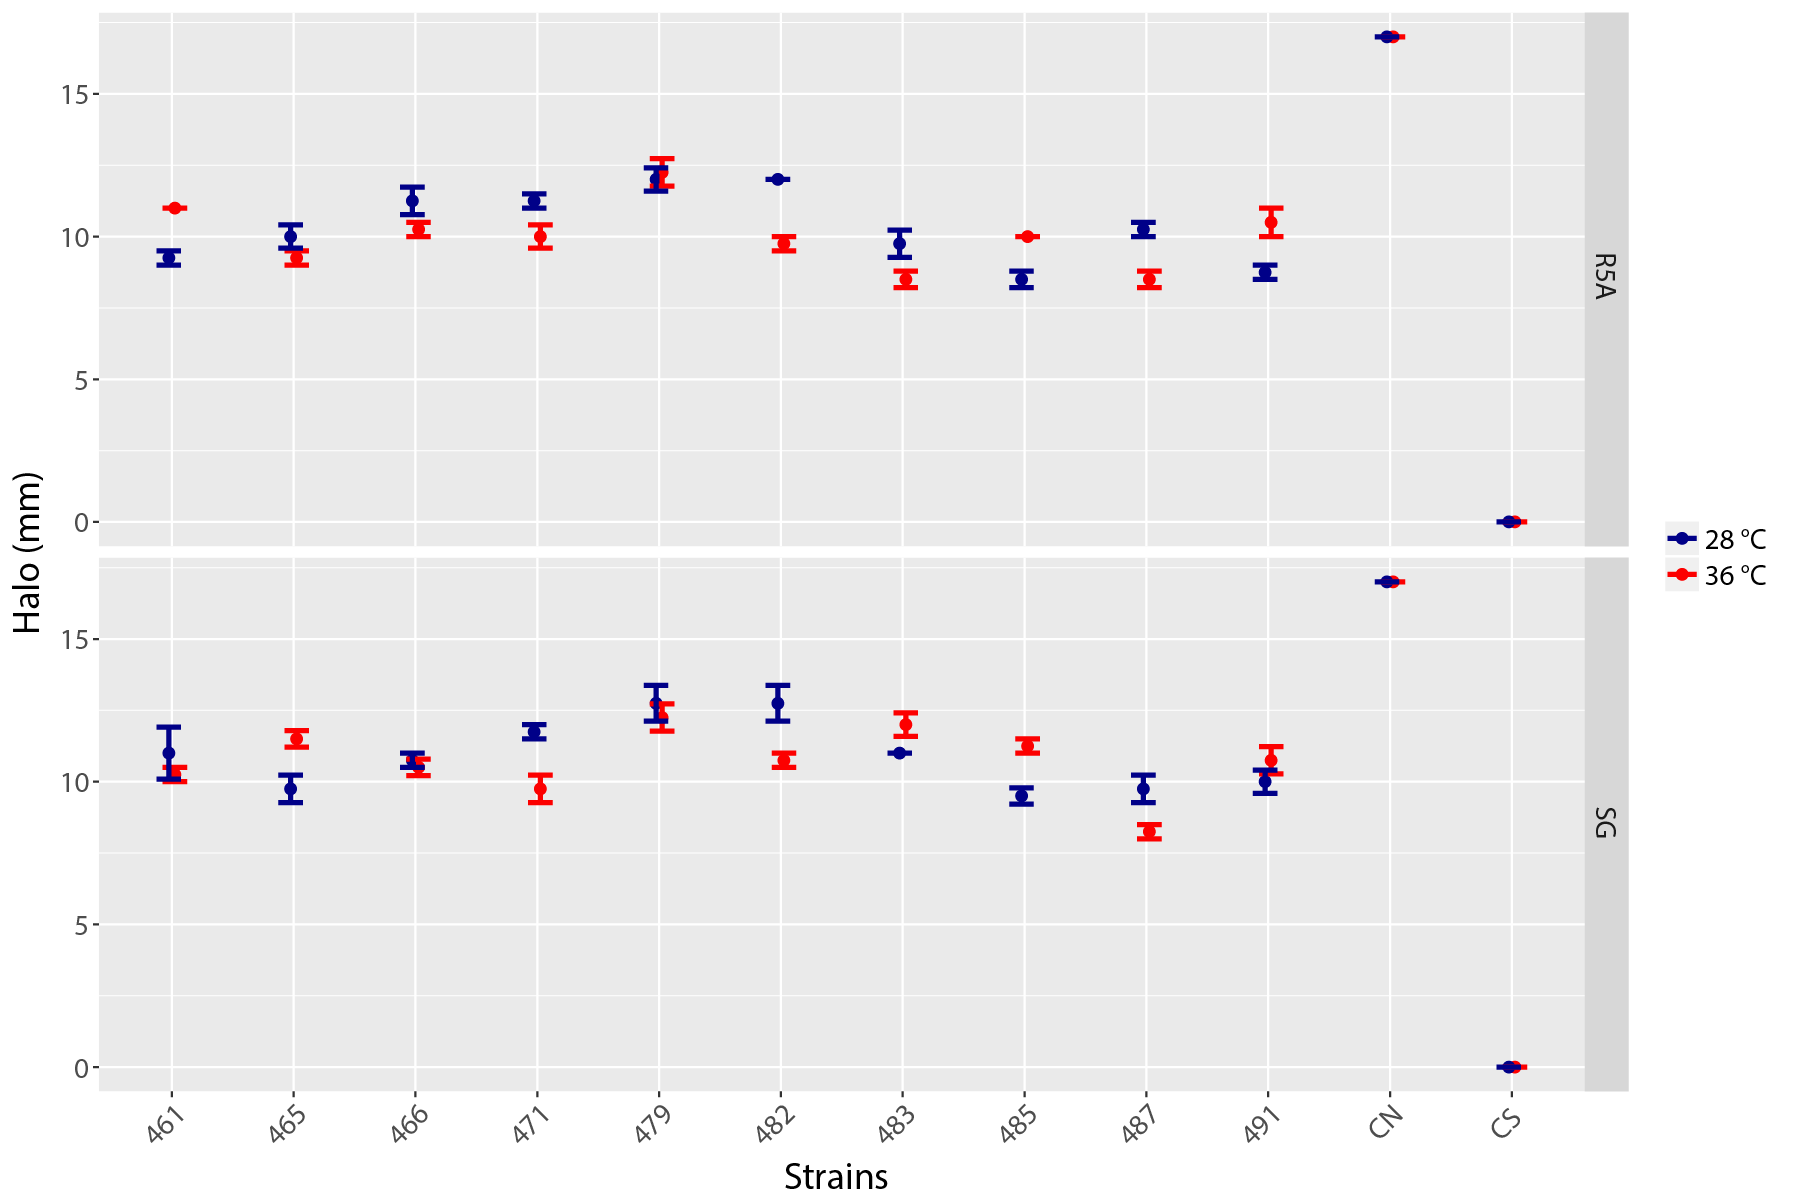


**Figure S6-**Inhibition zone (mm) of *Enterobacter cloacae* producer enzyme VIM (Verona integron-encoded metallo-β-lactamase) by extracts from endophytic actinomycetes in two media (SG and R5A) at two temperatures (28 °C and 36 °C).

*Enterobacter cloacae* produtor da enzima *VIM*

Mean (±SD), CS: Methanol, CN: negative control

*Stenotrophomonas maltophilia*


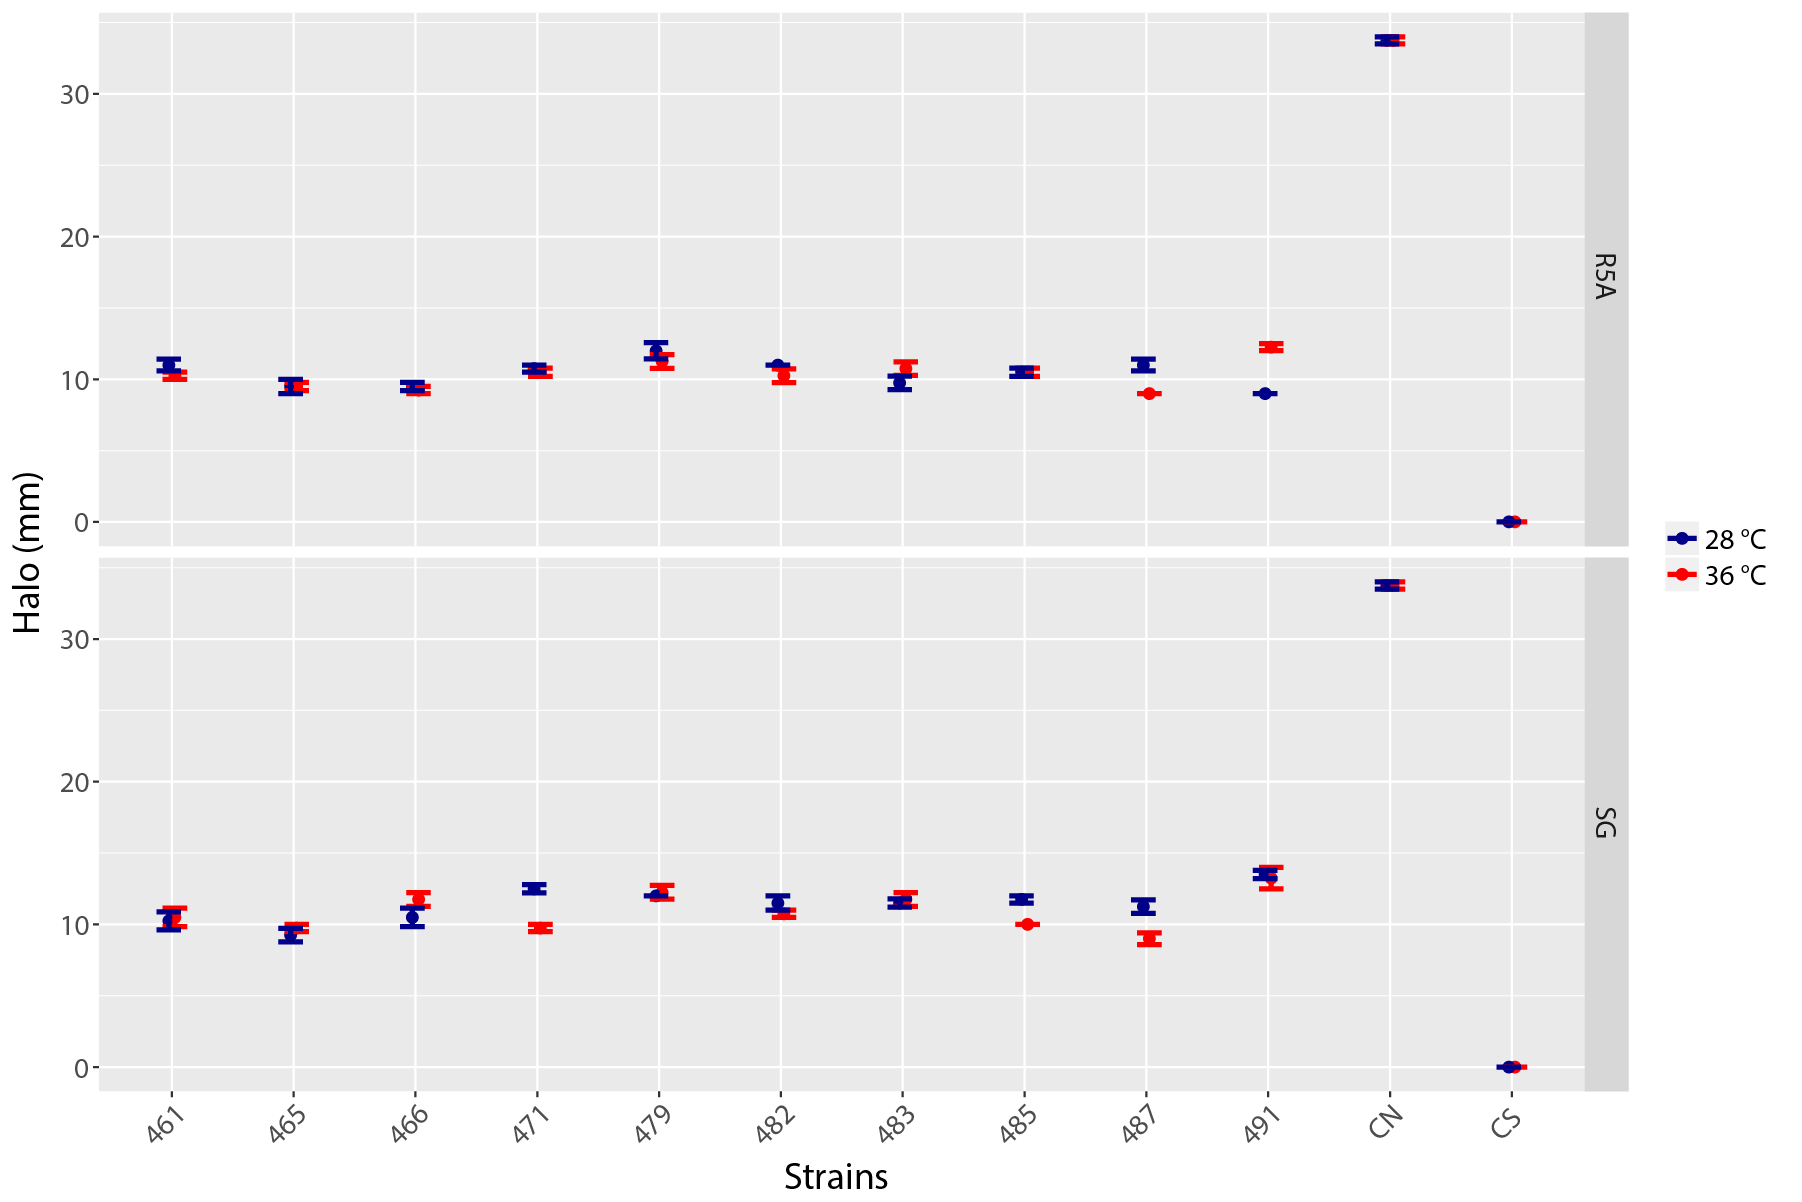


**Figure S7-**Inhibition zone (mm) of *Stenotrophomonas maltophilia* by extracts from endophytic actinomycetes in two media (SG and R5A) and two temperatures (28 °C and 36 °C).

Mean (±SD), CS: Methanol, CN: negative control


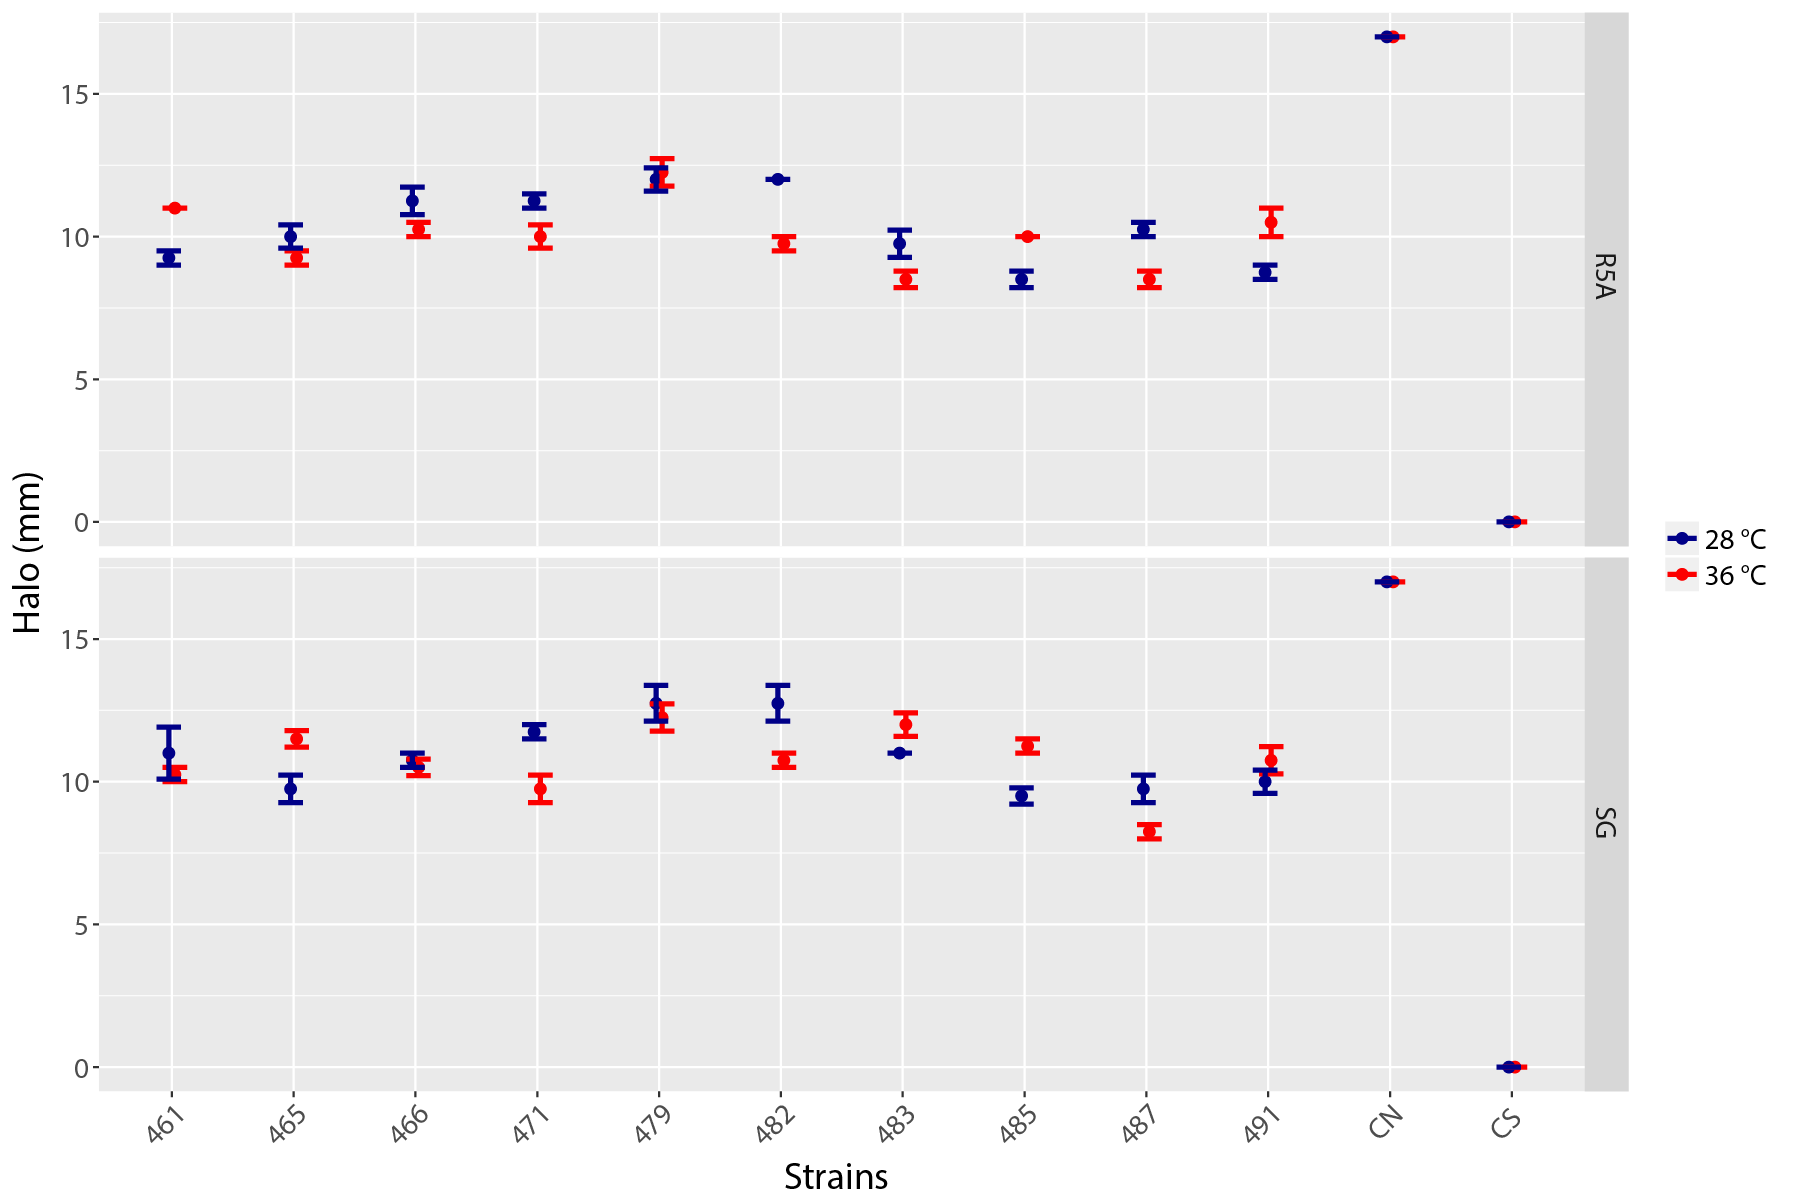


**Figure S8-**Inhibition zone (mm) of *Klebissiella pneumoniae* producer enzyme KPC (*K. pneumoniae* carbapemase) by extracts from endophytic actinomycetes in two media (SG and R5A) at two temperatures (28 °C and 36 °C).

*Klebsiella pneumoniae* producer of enzyme *KPC*

Mean (±SD), CS: Methanol, CN: negative control

**Fig. S9.** Work-up scheme of the metabolites produced by LGMF491


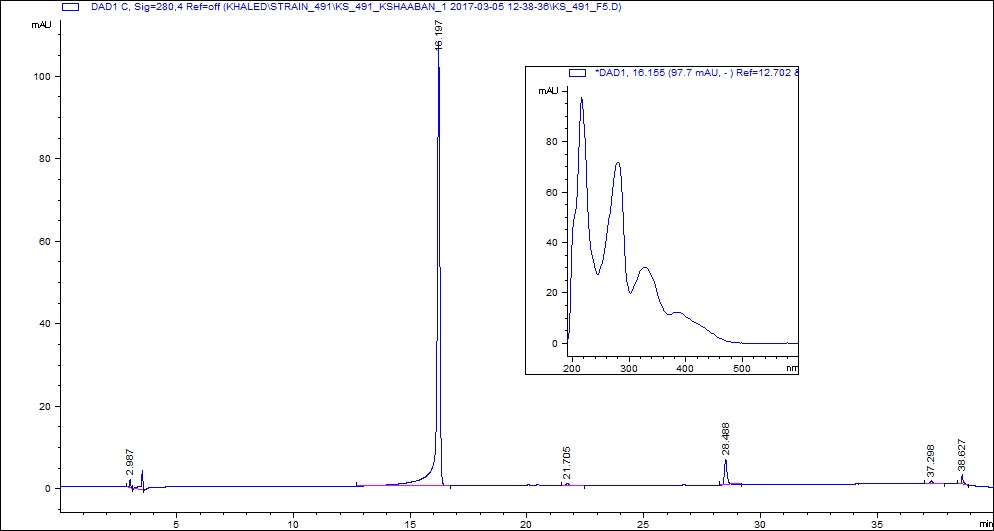


**Figure S10-**HPLC/UV analyses of 1-acetyl-β-carboline (**1**). HPLC-conditions: Detection wavelength 280 nm; solvent A: H2O/0.1% TFA; solvent B: acetonitrile; flow rate: 1.0 mL min-1; 0-35 min, 95-0% A (linear gradient); 35-40 min 0% A; 40-41 min 0-95% A (linear gradient); 41-45 min 95% A.

**[M + H]+**

**Figure S11-**HPLC/MS analyses of 1-acetyl-β-carboline (**1**). HPLC-conditions: Detection wavelength 254 nm; solvent A: H2O/0.1% Formic acid, solvent B: CH3CN/0.1% Formic acid; flow rate: 0.5 mL min-1; 0-4 min, 10% B; 4-22 min, 10-100% B; 22-27 min, 100% B; 27-29 min, 100%-10% B; 29-30 min, 10 % B.

**Figure S12-**1H NMR spectrum (DMSO-*d*6, 400 MHz) of 1-acetyl-β-carboline (**1**)

**Figure S13-**13C NMR spectrum (DMSO-*d*6, 100 MHz) of 1-acetyl-β-carboline (**1**)

**
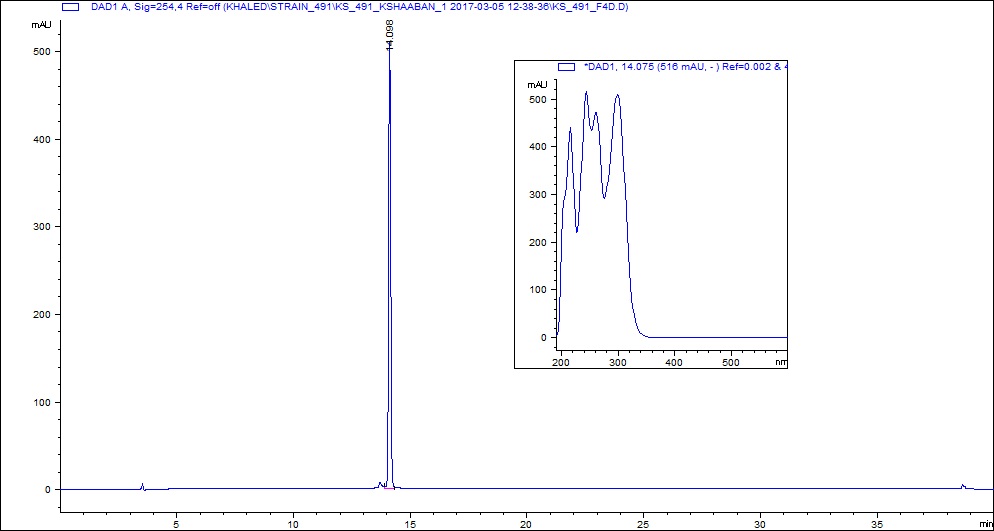
**

**Figure S14-**HPLC/UV analyses of indole-3-carbaldehyde (**2**). HPLC-conditions: Detection wavelength 254 nm; solvent A: H2O/0.1% TFA; solvent B: acetonitrile; flow rate: 1.0 mL min-1; 0-35 min, 95-0% A (linear gradient); 35-40 min 0% A; 40-41 min 0-95% A (linear gradient); 41-45 min 95% A.

**[M - H]**−

**[M + H]+**

**Figure S15-**HPLC/MS analyses of indole-3-carbaldehyde (**2**). HPLC-conditions: Detection wavelength 254 nm; solvent A: H2O/0.1% Formic acid, solvent B: CH3CN/0.1% Formic acid; flow rate: 0.5 mL min-1; 0-4 min, 10% B; 4-22 min, 10-100% B; 22-27 min, 100% B; 27-29 min, 100%-10% B; 29-30 min, 10 % B.

**Figure S16-**1H NMR spectrum (CD3OD, 400 MHz) of indole-3-carbaldehyde (**2**)

**Figure S17-**13C NMR spectrum (CD3OD, 100 MHz) of indole-3-carbaldehyde (**2**)

**
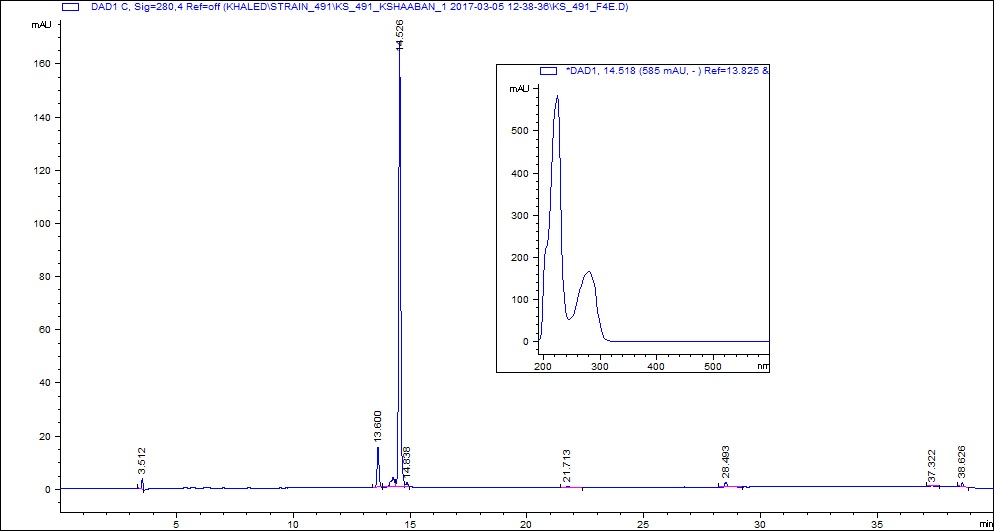
**

**Figure S18-**HPLC/UV analyses of tryptophol (**3**). HPLC-conditions: Detection wavelength 280 nm; solvent A: H2O/0.1% TFA; solvent B: acetonitrile; flow rate: 1.0 mL min-1; 0-35 min, 95-0% A (linear gradient); 35-40 min 0% A; 40-41 min 0-95% A (linear gradient); 41-45 min 95% A.

**[M + H]+**

**Figure S19-**HPLC/MS analyses of tryptophol (**3**). HPLC-conditions: Detection wavelength 254 nm; solvent A: H2O/0.1% Formic acid, solvent B: CH3CN/0.1% Formic acid; flow rate: 0.5 mL min-1; 0-4 min, 10% B; 4-22 min, 10-100% B; 22-27 min, 100% B; 27-29 min, 100%-10% B; 29-30 min, 10 % B.

**Figure S20-**1H NMR spectrum (CD3OD, 400 MHz) of tryptophol (**3**)

**Figure S21-**13C NMR spectrum (CD3OD, 100 MHz) of tryptophol (**3**)

**
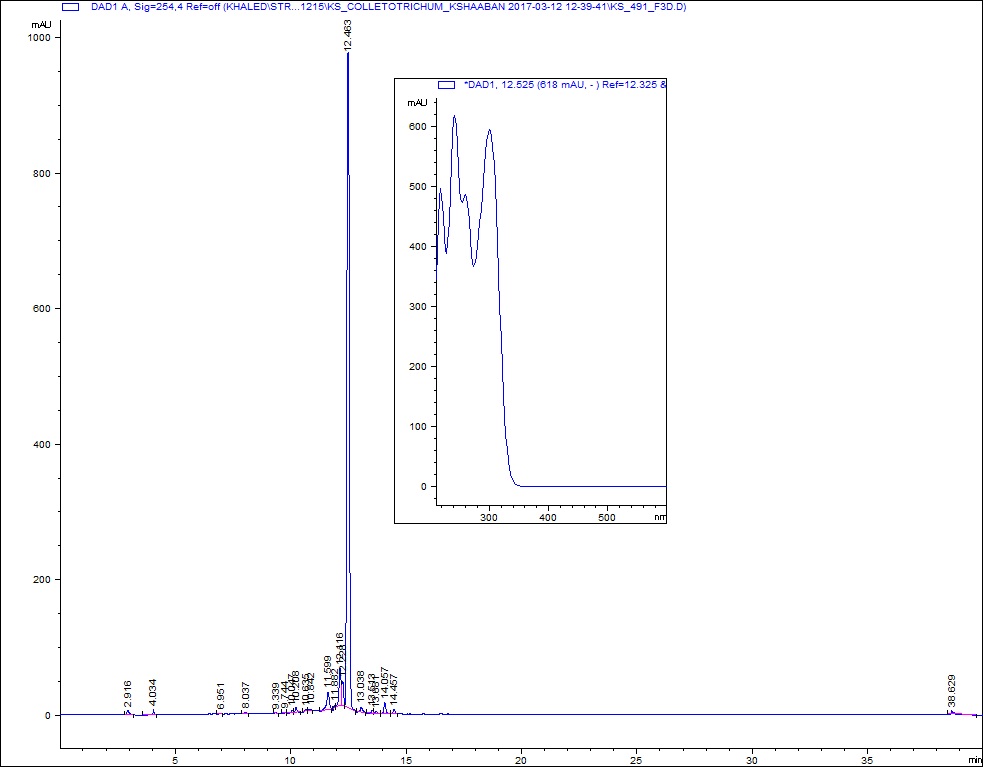
**

**Figure S22-**HPLC/UV analyses of 3-(hydroxyacetyl)-indole (**4**). HPLC-conditions: Detection wavelength 254 nm; solvent A: H2O/0.1% TFA; solvent B: acetonitrile; flow rate: 1.0 mL min-1; 0-35 min, 95-0% A (linear gradient); 35-40 min 0% A; 40-41 min 0-95% A (linear gradient); 41-45 min 95% A.

**[M - H]**−

**[M + H]+**

**Figure S23-**HPLC/MS analyses of3-(hydroxyacetyl)-indole (**4**). HPLC-conditions: Detection wavelength 254 nm; solvent A: H2O/0.1% Formic acid, solvent B: CH3CN/0.1% Formic acid; flow rate: 0.5 mL min-1; 0-4 min, 10% B; 4-22 min, 10-100% B; 22-27 min, 100% B; 27-29 min, 100%-10% B; 29-30 min, 10 % B.

**Figure S24-**1H NMR spectrum (CD3OD, 400 MHz) of 3-(hydroxyacetyl)-indole (**4**)

**Figure S25-**13C NMR spectrum (CD3OD, 100 MHz) of 3-(hydroxyacetyl)-indole (**4**)


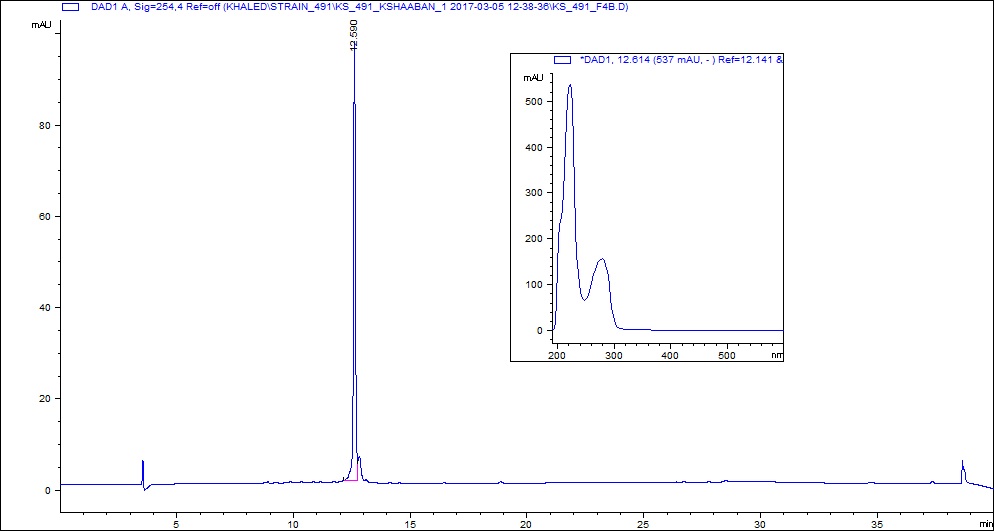


**Figure S26-**HPLC/UV analyses of brevianamide F (**5**). HPLC-conditions: Detection wavelength 254 nm; solvent A: H2O/0.1% TFA; solvent B: acetonitrile; flow rate: 1.0 mL min-1; 0-35 min, 95-0% A (linear gradient); 35-40 min 0% A; 40-41 min 0-95% A (linear gradient); 41-45 min 95% A.

**[M + H]+**

**[M - H]**−

**Figure S27-**HPLC/MS analyses ofbrevianamide F (**5**). HPLC-conditions: Detection wavelength 254 nm; solvent A: H2O/0.1% Formic acid, solvent B: CH3CN/0.1% Formic acid; flow rate: 0.5 mL min-1; 0-4 min, 10% B; 4-22 min, 10-100% B; 22-27 min, 100% B; 27-29 min, 100%-10% B; 29-30 min, 10 % B.

**Figure S28-**1H NMR spectrum (CD3OD, 400 MHz) of brevianamide F (**5**)

**Figure S29-**13C NMR spectrum (CD3OD, 100 MHz) of brevianamide F (**5**)

**
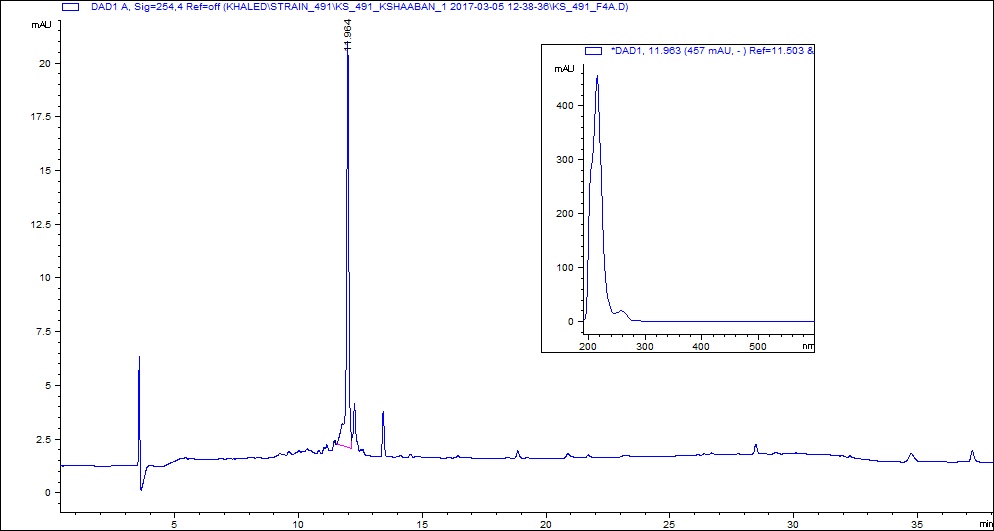
**

**Figure S30-**HPLC/UV analyses of cyclo-(l-Pro-l-Phe) (**6**). HPLC-conditions: Detection wavelength 254 nm; solvent A: H2O/0.1% TFA; solvent B: acetonitrile; flow rate: 1.0 mL min-1; 0-35 min, 95-0% A (linear gradient); 35-40 min 0% A; 40-41 min 0-95% A (linear gradient); 41-45 min 95% A.

**[M + H]+**

**Figure S31-**HPLC/MS analyses ofcyclo-(l-Pro-l-Phe) (**6**). HPLC-conditions: Detection wavelength 254 nm; solvent A: H2O/0.1% Formic acid, solvent B: CH3CN/0.1% Formic acid; flow rate: 0.5 mL min-1; 0-4 min, 10% B; 4-22 min, 10-100% B; 22-27 min, 100% B; 27-29 min, 100%-10% B; 29-30 min, 10 % B.

**Figure S32-**1H NMR spectrum (CD3OD, 400 MHz) of cyclo-(l-Pro-l-Phe) (**6**)

**Figure S33-**13C NMR spectrum (CD3OD, 100 MHz) of cyclo-(l-Pro-l-Phe) (**6**)

**
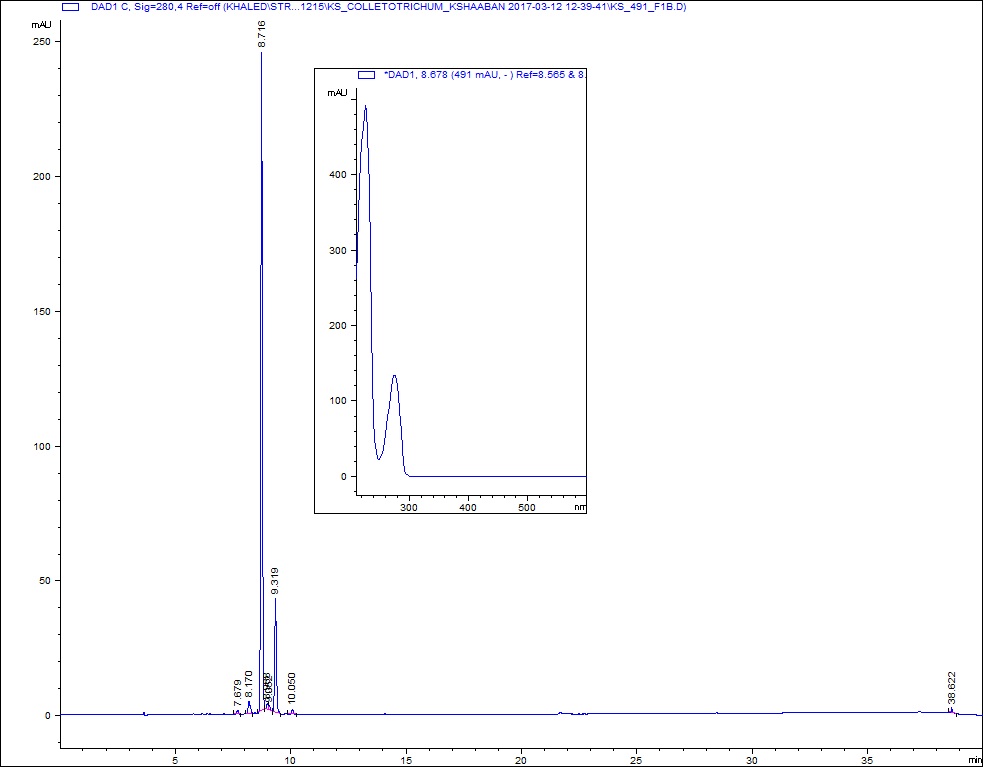
**

**Figure S34-**HPLC/UV analyses of cyclo-(l-Pro-l-Tyr) (**7**). HPLC-conditions: Detection wavelength 254 nm; solvent A: H2O/0.1% TFA; solvent B: acetonitrile; flow rate: 1.0 mL min-1; 0-35 min, 95-0% A (linear gradient); 35-40 min 0% A; 40-41 min 0-95% A (linear gradient); 41-45 min 95% A.

**[M - H]**−

**[M + H]+**

**Figure S35-**HPLC/MS analyses ofcyclo-(l-Pro-l-Tyr) (**7**). HPLC-conditions: Detection wavelength 254 nm; solvent A: H2O/0.1% Formic acid, solvent B: CH3CN/0.1% Formic acid; flow rate: 0.5 mL min-1; 0-4 min, 10% B; 4-22 min, 10-100% B; 22-27 min, 100% B; 27-29 min, 100%-10% B; 29-30 min, 10 % B.

**Figure S36-**1H NMR spectrum (CD3OD, 400 MHz) of cyclo-(l-Pro-l-Tyr) (**7**)

**Figure S37-**13C NMR spectrum (CD3OD, 100 MHz) of cyclo-(l-Pro-l-Tyr) (**7**)

**[M + H]+**

**Figure S38-**HPLC/MS analyses of cyclo-(l-Pro-l-Leu) (**8**). HPLC-conditions: Detection wavelength 254 nm; solvent A: H2O/0.1% Formic acid, solvent B: CH3CN/0.1% Formic acid; flow rate: 0.5 mL min-1; 0-4 min, 10% B; 4-22 min, 10-100% B; 22-27 min, 100% B; 27-29 min, 100%-10% B; 29-30 min, 10 % B.

**Figure S39-**1H NMR spectrum (CD3OD, 400 MHz) of cyclo-(l-Pro-l-Leu) (**8**)

**Figure S40-**13C NMR spectrum (CD3OD, 100 MHz) of cyclo-(l-Pro-l-Leu) (**8**)

**[M + H]+**

**Figure S41-**HPLC/MS analyses of cyclo-(l-Val-l-Phe) (**9**). HPLC-conditions: Detection wavelength 254 nm; solvent A: H2O/0.1% Formic acid, solvent B: CH3CN/0.1% Formic acid; flow rate: 0.5 mL min-1; 0-4 min, 10% B; 4-22 min, 10-100% B; 22-27 min, 100% B; 27-29 min, 100%-10% B; 29-30 min, 10 % B.

**Figure S42-**1H NMR spectrum (CD3OD, 400 MHz) of cyclo-(l-Val-l-Phe) (**9**)

**Figure S43-**13C NMR spectrum (CD3OD, 100 MHz) of cyclo-(l-Val-l-Phe) (**9**)

Table S1- Similarity percentage matrix for the gene 16S rRNA, of LGMB466 and 487- *Actinomadura* genus

|  |  | **[1]** | **[2]** | **[3]** | **[4]** | **[5]** | **[6]** | **[7]** | **[8]** | **[9]** | **[10]** | **[11]** | **[12]** | **[13]** | **[14]** |
| --- | --- | --- | --- | --- | --- | --- | --- | --- | --- | --- | --- | --- | --- | --- | --- |
| **[1]** | *Actinomadura alba* |  |  |  |  |  |  |  |  |  |  |  |  |  |  |
| **[2]** | *Actinomadura amylolytica* | 94,72 |  |  |  |  |  |  |  |  |  |  |  |  |  |
| **[3]** | *Actinomadura apis* | 93,79 | 93,94 |  |  |  |  |  |  |  |  |  |  |  |  |
| **[4]** | *Actinomadura atramentaria* | 93,01 | 94,29 | 94,79 |  |  |  |  |  |  |  |  |  |  |  |
| **[5]** | *Actinomadura bangladeshensis* | 94,29 | 95,65 | 97 | 95,79 |  |  |  |  |  |  |  |  |  |  |
| **[6]** | *Actinomadura cellulosilytica* | 94,58 | 98,07 | 94,08 | 94,29 | 95,44 |  |  |  |  |  |  |  |  |  |
| **[7]** | *Actinomadura chokoriensis* | 93,3 | 94,86 | 96,08 | 94,72 | 98,64 | 94,44 |  |  |  |  |  |  |  |  |
| **[8]** | *Actinomadura citrea* | 94,15 | 94,79 | 97,15 | 95,86 | 98,07 | 94,94 | 97 |  |  |  |  |  |  |  |
| **[9]** | *Actinomadura coerulea* | 93,58 | 94,51 | 96,72 | 96,01 | 97,65 | 94,58 | 96,58 | 98,79 |  |  |  |  |  |  |
| **[10]** | *Actinomadura cremea* | 92,94 | 94,01 | 98,72 | 94,72 | 96,93 | 94,22 | 96,08 | 97,22 | 96,79 |  |  |  |  |  |
| **[11]** | *Actinomadura darangshiensis* | 94,08 | 95,22 | 96,43 | 95,29 | 98,22 | 95,44 | 97,15 | 97,57 | 96,86 | 96,36 |  |  |  |  |
| **[12]** | *Actinomadura echinospora* | 95,44 | 97,43 | 94,94 | 94,22 | 95,58 | 97,22 | 94,58 | 95,36 | 94,86 | 94,08 | 95,22 |  |  |  |
| **[13]** | *Actinomadura fibrosa* | 94,94 | 95,08 | 96,93 | 95,86 | 97,08 | 94,94 | 96,01 | 97,43 | 97,29 | 96,01 | 96,15 | 95,72 |  |  |
| **[14]** | *Actinomadura flavalba* | 93,72 | 95,15 | 95,29 | 97,08 | 96,29 | 95,51 | 95,22 | 96,29 | 95,65 | 95,22 | 96,36 | 95,01 | 96,22 |  |
| **[15]** | *Actinomadura formosensis* | 93,51 | 94,51 | 96,86 | 95,44 | 97,43 | 94,51 | 96,5 | 97,93 | 97,36 | 96,93 | 97 | 94,65 | 96,65 | 95,44 |
| **[16]** | *Actinomadura geliboluensis* | 94,01 | 95,15 | 97,43 | 96,08 | 98,64 | 95,29 | 97,72 | 98 | 97,57 | 97,36 | 97,86 | 95,29 | 96,86 | 96,29 |
| **[17]** | *Actinomadura glauciflava* | 94,15 | 95,08 | 97,43 | 95,86 | 98,22 | 95,15 | 97,15 | 99,5 | 99,14 | 97,5 | 97,43 | 95,44 | 97,72 | 96,36 |
| **[18]** | *Actinomadura hallensis* | 94,58 | 93,79 | 94,94 | 94,22 | 95,93 | 94,15 | 94,94 | 95,22 | 94,79 | 94,94 | 95,22 | 94,08 | 94,44 | 94,72 |
| **[19]** | *Actinomadura keratinilytica* | 94,29 | 94,15 | 95,58 | 96,08 | 95,51 | 94,58 | 94,51 | 95,08 | 94,65 | 94,65 | 95,01 | 95,15 | 95,93 | 96,29 |
| **[20]** | *Actinomadura kijaniata* | 94,01 | 94,79 | 96,01 | 95,51 | 96,5 | 94,72 | 95,44 | 95,86 | 95,51 | 95,08 | 96,01 | 94,94 | 96,58 | 96,65 |
| **[21]** | *Actinomadura latina* | 93,94 | 94,72 | 96,43 | 95,08 | 97,72 | 94,86 | 96,79 | 96,93 | 96,22 | 96,22 | 97,57 | 94,65 | 96,08 | 95,86 |
| **[22]** | *Actinomadura luteofluorescens* | 93,58 | 94,51 | 96,65 | 95,72 | 97,65 | 94,51 | 96,58 | 98,64 | 99,14 | 96,72 | 96,79 | 94,86 | 97 | 95,72 |
| **[23]** | *Actinomadura macra* | 93,72 | 94,58 | 96,15 | 95,51 | 97,36 | 94,29 | 96,43 | 97,79 | 98,07 | 96,08 | 97 | 94,94 | 96,22 | 95,15 |
| **[24]** | *Actinomadura madurae* | 94,58 | 95,36 | 97,15 | 95,44 | 98,22 | 95,22 | 97,15 | 98,22 | 97,36 | 97 | 98,57 | 95,51 | 96,79 | 96,36 |

Table S1- Similarity percentage matrix for the gene 16S rRNA, of LGMB466 and 487- *Actinomadura* genus

|  | |  | | **[1]** | | **[2]** | | **[3]** | | **[4]** | | **[5]** | | **[6]** | | **[7]** | | **[8]** | | **[9]** | | **[10]** | | **[11]** | | **[12]** | | **[13]** | | **[14]** | |
| --- | --- | --- | --- | --- | --- | --- | --- | --- | --- | --- | --- | --- | --- | --- | --- | --- | --- | --- | --- | --- | --- | --- | --- | --- | --- | --- | --- | --- | --- | --- | --- |
| **[25]** | | *Actinomadura mexicana* | | 94,22 | | 94,94 | | 97,08 | | 95,72 | | 98 | | 95,01 | | 96,93 | | 99,36 | | 98,57 | | 97,08 | | 97,43 | | 95,08 | | 97,36 | | 96,36 | |
| **[26]** | | *Actinomadura namibiensis* | | 93,94 | | 94,72 | | 96,08 | | 95,36 | | 96,29 | | 94,79 | | 95,29 | | 95,72 | | 95,29 | | 95,22 | | 95,79 | | 95,01 | | 96,36 | | 96,5 | |
| **[27]** | | *Actinomadura meyerae* | | 93,94 | | 95,22 | | 97 | | 95,86 | | 98,93 | | 95,22 | | 97,86 | | 98,07 | | 97,86 | | 96,86 | | 97,79 | | 95,36 | | 96,79 | | 96,43 | |
| **[28]** | | *Actinomadura nitritigenes* | | 95,01 | | 95,29 | | 96,72 | | 95,86 | | 97,57 | | 95,51 | | 96,5 | | 97,22 | | 97 | | 95,79 | | 96,93 | | 96,22 | | 98,22 | | 96,65 | |
| **[29]** | | *Actinomadura miaoliensis* | | 93,94 | | 94,44 | | 95,44 | | 96,01 | | 96,01 | | 94,58 | | 95,01 | | 95,36 | | 94,94 | | 94,58 | | 95,36 | | 95,44 | | 96,29 | | 96,36 | |
| **[30]** | | *Actinomadura rifamycini* | | 92,65 | | 92,87 | | 98,43 | | 94,29 | | 95,79 | | 93,08 | | 94,72 | | 95,93 | | 96,36 | | 97,79 | | 95,44 | | 93,79 | | 95,86 | | 94,37 | |
| **[31]** | | *Actinomadura rayongensis* | | 92,94 | | 94,79 | | 95,08 | | 97,08 | | 96,08 | | 94,79 | | 94,94 | | 96,22 | | 95,79 | | 95,08 | | 95,01 | | 94,72 | | 96,08 | | 96,72 | |
| **[32]** | | *Actinomadura napierensis* | | 94,44 | | 95,15 | | 96,93 | | 95,58 | | 98,22 | | 95,01 | | 97,22 | | 97,57 | | 97 | | 96,86 | | 97,43 | | 95,01 | | 96,93 | | 96,58 | |
| **[33]** | | *Actinomadura rugatobispora* | | 92,87 | | 94,08 | | 94,79 | | 94,94 | | 96,58 | | 93,65 | | 95,79 | | 95,93 | | 96,29 | | 94,86 | | 96,08 | | 93,94 | | 95,29 | | 95,15 | |
| **[34]** | | *Actinomadura rubrobrunea* | | 93,22 | | 93,72 | | 94,65 | | 94,58 | | 94,65 | | 93,51 | | 93,79 | | 94,01 | | 93,51 | | 94,08 | | 94,22 | | 94,37 | | 94,58 | | 95,29 | |
| **[35]** | | *Actinomadura scrupuli* | | 95,22 | | 94,86 | | 94,65 | | 93,3 | | 95,15 | | 95,01 | | 94,15 | | 94,51 | | 94,44 | | 93,79 | | 95,01 | | 95,93 | | 95,51 | | 94,44 | |
| **[36]** | | *Actinomadura umbrina* | | 94,44 | | 97 | | 93,94 | | 93,79 | | 95,22 | | 97,5 | | 94,37 | | 94,65 | | 94,37 | | 94,08 | | 95,44 | | 96,65 | | 94,72 | | 95,15 | |
| **[37]** | | *Actinomadura sputi* | | 94,51 | | 94,44 | | 95,22 | | 94,44 | | 96,5 | | 94,22 | | 95,51 | | 95,44 | | 94,94 | | 95,22 | | 95,86 | | 94,37 | | 94,44 | | 95,22 | |
| **[38]** | | *Actinomadura viridilutea* | | 93,15 | | 93,65 | | 94,58 | | 94,51 | | 94,58 | | 93,44 | | 93,72 | | 93,94 | | 93,44 | | 93,87 | | 94,15 | | 94,29 | | 94,51 | | 95,22 | |
| **[39]** | | *Actinomadura sediminis* | | 92,44 | | 93,94 | | 97,15 | | 94,44 | | 96,79 | | 93,65 | | 95,86 | | 96,29 | | 95,86 | | 97,29 | | 96,08 | | 93,94 | | 95,36 | | 94,72 | |
| **[40]** | | *Actinomadura yumaensis* | | 93,79 | | 94,72 | | 95,44 | | 94,37 | | 96,79 | | 94,72 | | 96,01 | | 96,65 | | 96,29 | | 95,58 | | 96,08 | | 94,72 | | 95,72 | | 95,44 | |
| **[41]** | | *Actinomadura vinacea* | | 93,65 | | 95,08 | | 95,22 | | 95,01 | | 97 | | 94,65 | | 96,15 | | 96,65 | | 96,15 | | 95,29 | | 96,43 | | 95,01 | | 95,65 | | 95,22 | |
| **[42]** | | *Actinomadura xylanilytica* | | 94,86 | | 95,65 | | 96,22 | | 96,43 | | 97,86 | | 95,86 | | 96,79 | | 97,79 | | 97,36 | | 96,29 | | 97,08 | | 95,79 | | 98 | | 97,15 | |
| **[43]** | | *Actinomadura livida* | | 94,44 | | 94,86 | | 95,29 | | 94,51 | | 96,58 | | 95,01 | | 95,65 | | 96,22 | | 95,79 | | 95,22 | | 95,86 | | 94,86 | | 95,58 | | 95,15 | |
| **[44]** | | *Actinomadura hibisca* | | 93,37 | | 93,65 | | 96,15 | | 95,58 | | 96,22 | | 94,01 | | 95,22 | | 96,15 | | 95,79 | | 95,29 | | 95,72 | | 94,58 | | 96,93 | | 96,5 | |
| **[45]** | | *Actinomadura meridiana* | | 93,15 | | 94,29 | | 95,72 | | 94,44 | | 96,93 | | 94,44 | | 95,93 | | 97,08 | | 96,29 | | 95,79 | | 96,93 | | 94,51 | | 95,79 | | 94,86 | |
| **[46]** | | *Actinomadura fulvescens* | | 94,29 | | 94,72 | | 96,65 | | 95,22 | | 97,86 | | 94,65 | | 96,86 | | 97,36 | | 96,72 | | 95,79 | | 96,93 | | 95,86 | | 97,36 | | 95,93 | |
| **[47]** | | *Actinomadura chibensis* | | 93,3 | | 94,79 | | 95,22 | | 93,94 | | 96,72 | | 95,01 | | 95,86 | | 96,01 | | 95,58 | | 95,15 | | 96,01 | | 95,08 | | 95,08 | | 94,86 | |
| **[48]** | | *Actinomadura catellatispora* | | 92,37 | | 92,87 | | 93,22 | | 92,58 | | 94,65 | | 93,01 | | 93,65 | | 94,15 | | 93,72 | | 93,15 | | 93,79 | | 92,87 | | 93,51 | | 93,08 | |
| **[49]** | | *Actinomadura pelletieri* | | 93,08 | | 93,79 | | 95,58 | | 93,87 | | 96,08 | | 94,01 | | 95,15 | | 95,86 | | 95,36 | | 95,65 | | 95,65 | | 94,29 | | 94,79 | | 94,08 | |
| **[50]** | | *Actinomadura oligospora* | | 93,72 | | 94,22 | | 95,72 | | 95,36 | | 96,01 | | 94,08 | | 95,08 | | 95,65 | | 95,01 | | 94,65 | | 95,08 | | 95,08 | | 95,72 | | 96,01 | |
|  | |  | |  | |  | |  | |  | |  | |  | |  | |  | |  | |  | |  | |  | |  | |  | |
|  | |  | | **[1]** | | **[2]** | | **[3]** | | **[4]** | | **[5]** | | **[6]** | | **[7]** | | **[8]** | | **[9]** | | **[10]** | | **[11]** | | **[12]** | | **[13]** | | **[14]** | |
| **[51]** | | *Actinomadura rudentiformis* | | 94,58 | | 94,79 | | 96,86 | | 94,94 | | 97,36 | | 94,79 | | 96,36 | | 96,58 | | 96,15 | | 96,01 | | 97,43 | | 95,58 | | 96,93 | | 95,72 | |
| **[52]** | | *Actinomadura rupiterrae* | | 93,22 | | 94,22 | | 94,72 | | 94,58 | | 95,01 | | 94,44 | | 93,94 | | 94,37 | | 93,72 | | 93,79 | | 94,72 | | 94,65 | | 94,79 | | 95,22 | |
| **[53]** | | *Actinomadura verrucospora* | | 93,44 | | 94,51 | | 96,43 | | 95,72 | | 97,65 | | 94,51 | | 96,58 | | 98,36 | | 99,14 | | 96,5 | | 96,72 | | 94,86 | | 96,86 | | 95,44 | |
| **[54]** | | *Actinomadura viridis* | | 93,65 | | 95,01 | | 95,36 | | 94,86 | | 97 | | 94,79 | | 96,15 | | 96,72 | | 96,15 | | 95,44 | | 96,36 | | 94,86 | | 96,08 | | 95,29 | |
| **[55]** | | *Actinomadura syzygii* | | 93,15 | | 94,65 | | 95,72 | | 95,01 | | 97,65 | | 94,94 | | 96,65 | | 97 | | 96,58 | | 95,72 | | 96,86 | | 95,22 | | 96,15 | | 95,36 | |
| **[56]** | | *LGMB487* | | 94,94 | | 94,94 | | 96,93 | | 94,72 | | 97,22 | | 95,08 | | 96,29 | | 96,36 | | 95,93 | | 95,93 | | 97,36 | | 95,72 | | 96,93 | | 95,79 | |
| **[57]** | | *LGMB466* | | 95,22 | | 95,36 | | 97,15 | | 95,44 | | 97,43 | | 95,51 | | 96,5 | | 96,58 | | 96,15 | | 96,15 | | 97,43 | | 96,29 | | 97,65 | | 96,5 | |
| **[58]** | | *Streptomyces glauciniger* | | 89,59 | | 89,94 | | 90,09 | | 89,23 | | 90,01 | | 89,44 | | 89,3 | | 89,94 | | 89,66 | | 89,59 | | 89,8 | | 90,01 | | 90,73 | | 90,16 | |

Table S1- Similarity percentage matrix for the gene 16S rRNA, of LGMB466 and 487- *Actinomadura* genus

|  |  | **[15]** | **[16]** | **[17]** | **[18]** | **[19]** | **[20]** | **[21]** | **[22]** | **[23]** | **[24]** | **[25]** | **[26]** | **[27]** | **[28]** |
| --- | --- | --- | --- | --- | --- | --- | --- | --- | --- | --- | --- | --- | --- | --- | --- |
| **[16]** | *Actinomadura geliboluensis* | 98,5 |  |  |  |  |  |  |  |  |  |  |  |  |  |
| **[17]** | *Actinomadura glauciflava* | 97,93 | 98,15 |  |  |  |  |  |  |  |  |  |  |  |  |
| **[18]** | *Actinomadura hallensis* | 94,86 | 96,15 | 95,36 |  |  |  |  |  |  |  |  |  |  |  |
| **[19]** | *Actinomadura keratinilytica* | 95,01 | 95,86 | 95,22 | 94,94 |  |  |  |  |  |  |  |  |  |  |
| **[20]** | *Actinomadura kijaniata* | 95,15 | 96,01 | 96,01 | 94,01 | 95,79 |  |  |  |  |  |  |  |  |  |
| **[21]** | *Actinomadura latina* | 96,72 | 97,57 | 96,79 | 95,22 | 94,94 | 95,72 |  |  |  |  |  |  |  |  |
| **[22]** | *Actinomadura luteofluorescens* | 97,08 | 97,57 | 99,14 | 94,79 | 94,58 | 95,44 | 96,15 |  |  |  |  |  |  |  |
| **[23]** | *Actinomadura macra* | 96,65 | 97,22 | 97,79 | 94,79 | 94,44 | 94,86 | 96,36 | 97,93 |  |  |  |  |  |  |
| **[24]** | *Actinomadura madurae* | 97,29 | 98,15 | 97,93 | 95,44 | 95,22 | 96,22 | 97,65 | 97,36 | 97,22 |  |  |  |  |  |
| **[25]** | *Actinomadura mexicana* | 97,93 | 97,93 | 99,29 | 95,29 | 95,08 | 95,72 | 97,08 | 98,43 | 97,5 | 98,07 |  |  |  |  |
| **[26]** | *Actinomadura namibiensis* | 95,08 | 95,93 | 95,86 | 94,08 | 95,93 | 99,5 | 95,72 | 95,22 | 94,72 | 96,15 | 95,58 |  |  |  |
| **[27]** | *Actinomadura meyerae* | 97,5 | 98,72 | 98,22 | 95,86 | 95,44 | 96,29 | 97,36 | 97,86 | 97,22 | 98 | 98 | 96,15 |  |  |
| **[28]** | *Actinomadura nitritigenes* | 96,43 | 97,5 | 97,43 | 95,01 | 96,5 | 96,93 | 96,65 | 96,79 | 96,22 | 97,15 | 97,36 | 96,79 | 97,5 |  |
| **[29]** | *Actinomadura miaoliensis* | 95,08 | 96,08 | 95,51 | 94,65 | 98,64 | 96,22 | 95,36 | 94,86 | 94,79 | 95,44 | 95,36 | 96,29 | 95,93 | 97 |

Table S1- Similarity percentage matrix for the gene 16S rRNA, of LGMB466 and 487- *Actinomadura* genus

|  |  | **[15]** | **[16]** | **[17]** | **[18]** | **[19]** | **[20]** | **[21]** | **[22]** | **[23]** | **[24]** | **[25]** | **[26]** | **[27]** | **[28]** |
| --- | --- | --- | --- | --- | --- | --- | --- | --- | --- | --- | --- | --- | --- | --- | --- |
| **[30]** | *Actinomadura rifamycini* | 95,72 | 96,15 | 96,22 | 93,87 | 94,44 | 95,15 | 95,08 | 96,29 | 95,51 | 95,86 | 95,86 | 95,08 | 96,01 | 95,51 |
| **[31]** | *Actinomadura rayongensis* | 95,29 | 95,72 | 96,36 | 94,15 | 95,51 | 95,65 | 94,94 | 95,58 | 95,08 | 95,36 | 96,08 | 95,51 | 95,72 | 95,65 |
| **[32]** | *Actinomadura napierensis* | 97,15 | 97,93 | 97,57 | 95,72 | 95,36 | 96,36 | 97,86 | 96,93 | 96,65 | 97,79 | 97,57 | 96,36 | 97,86 | 97,29 |
| **[33]** | *Actinomadura rugatobispora* | 95,58 | 95,93 | 96,15 | 93,79 | 94,01 | 95,58 | 95,08 | 96,29 | 95,58 | 96,08 | 95,79 | 95,36 | 96,43 | 95,22 |
| **[34]** | *Actinomadura rubrobrunea* | 93,51 | 94,37 | 94,08 | 93,65 | 97,36 | 95,36 | 93,87 | 93,51 | 93,44 | 94,58 | 93,87 | 95,51 | 94,51 | 95,22 |
| **[35]** | *Actinomadura scrupuli* | 94,01 | 94,65 | 94,79 | 93,3 | 94,22 | 95,22 | 94,29 | 94,22 | 94,15 | 94,65 | 94,51 | 95,22 | 94,72 | 95,86 |
| **[36]** | *Actinomadura umbrina* | 94,15 | 94,94 | 94,79 | 93,65 | 93,65 | 94,58 | 94,72 | 94,29 | 94,22 | 95,08 | 94,58 | 94,51 | 95,22 | 95,15 |
| **[37]** | *Actinomadura sputi* | 94,94 | 96,22 | 95,51 | 98,29 | 94,72 | 95,01 | 95,51 | 94,94 | 94,94 | 95,93 | 95,29 | 95,01 | 96,22 | 95,15 |
| **[38]** | *Actinomadura viridilutea* | 93,44 | 94,29 | 94,01 | 93,58 | 97,29 | 95,29 | 93,87 | 93,44 | 93,37 | 94,51 | 93,79 | 95,44 | 94,44 | 95,15 |
| **[39]** | *Actinomadura sediminis* | 96,22 | 96,79 | 96,58 | 94,29 | 93,87 | 95,15 | 95,72 | 95,79 | 95,29 | 96,43 | 96,22 | 95,08 | 96,5 | 95,15 |
| **[40]** | *Actinomadura yumaensis* | 95,58 | 96,58 | 97 | 95,01 | 94,44 | 95,15 | 95,51 | 96,43 | 95,44 | 96,22 | 96,72 | 95,08 | 96,86 | 96,22 |
| **[41]** | *Actinomadura vinacea* | 96,22 | 96,5 | 96,72 | 94,94 | 94,58 | 95,65 | 95,58 | 96,22 | 95,58 | 96,58 | 96,65 | 95,51 | 96,65 | 96,01 |
| **[42]** | *Actinomadura xylanilytica* | 96,65 | 97,57 | 98 | 95,29 | 95,86 | 96,43 | 96,93 | 97,36 | 96,65 | 97,43 | 97,72 | 96,29 | 97,5 | 98,29 |
| **[43]** | *Actinomadura livida* | 95,65 | 96,36 | 96,36 | 95,65 | 95,15 | 94,65 | 95,58 | 95,79 | 95,36 | 95,93 | 96,29 | 94,58 | 96,22 | 95,72 |
| **[44]** | *Actinomadura hibisca* | 95,36 | 96,22 | 96,36 | 94,22 | 96,01 | 97,57 | 95,29 | 95,72 | 95,01 | 95,93 | 95,93 | 97,57 | 96,15 | 97 |
| **[45]** | *Actinomadura meridiana* | 96,79 | 97 | 96,86 | 93,94 | 94,08 | 94,65 | 95,93 | 96,08 | 95,86 | 96,5 | 96,86 | 94,58 | 96,58 | 95,72 |
| **[46]** | *Actinomadura fulvescens* | 97 | 97,65 | 97,29 | 94,86 | 95,58 | 96,22 | 96,5 | 96,65 | 96,15 | 96,93 | 97,22 | 96,08 | 97,5 | 97,65 |
| **[47]** | *Actinomadura chibensis* | 95,51 | 96,5 | 96,15 | 94,58 | 94,65 | 94,58 | 95,72 | 95,51 | 95,58 | 95,86 | 95,86 | 94,65 | 96,5 | 95,72 |
| **[48]** | *Actinomadura catellatispora* | 93,58 | 94,29 | 94,29 | 93,58 | 93,15 | 92,58 | 93,79 | 93,72 | 93,3 | 93,87 | 94,22 | 92,51 | 94,29 | 93,65 |
| **[49]** | *Actinomadura pelletieri* | 95,36 | 95,93 | 95,93 | 94,01 | 94,01 | 93,79 | 95,22 | 95,15 | 95,65 | 95,65 | 95,72 | 94,01 | 95,79 | 94,79 |
| **[50]** | *Actinomadura oligospora* | 95,08 | 95,86 | 95,58 | 93,94 | 96,15 | 96,43 | 95,15 | 94,86 | 94,86 | 95,36 | 95,58 | 96,5 | 95,79 | 96,22 |
| **[51]** | *Actinomadura rudentiformis* | 96,58 | 97,08 | 96,72 | 94,58 | 95,58 | 96,15 | 96,5 | 96,01 | 95,93 | 97,72 | 96,58 | 96,08 | 97,15 | 97,22 |
| **[52]** | *Actinomadura rupiterrae* | 93,65 | 94,65 | 94,29 | 93,58 | 94,86 | 95,51 | 94,44 | 93,65 | 93,44 | 95,22 | 94,29 | 95,58 | 94,79 | 95,08 |
| **[53]** | *Actinomadura verrucospora* | 97,15 | 97,5 | 98,72 | 94,72 | 94,44 | 95,29 | 96,08 | 99,29 | 97,93 | 97,29 | 98,15 | 95,08 | 97,86 | 96,79 |
| **[54]** | *Actinomadura viridis* | 96,22 | 96,5 | 96,72 | 95,08 | 94,51 | 95,44 | 95,65 | 96,22 | 95,51 | 96,58 | 96,65 | 95,29 | 96,58 | 95,93 |

Table S1- Similarity percentage matrix for the gene 16S rRNA, of LGMB466 and 487- *Actinomadura* genus

|  |  | **[15]** | **[16]** | **[17]** | **[18]** | **[19]** | **[20]** | **[21]** | **[22]** | **[23]** | **[24]** | **[25]** | **[26]** | **[27]** | **[28]** |
| --- | --- | --- | --- | --- | --- | --- | --- | --- | --- | --- | --- | --- | --- | --- | --- |
| **[55]** | *Actinomadura syzygii* | 96,65 | 97,65 | 97,15 | 94,58 | 95,36 | 95,44 | 96,43 | 96,5 | 96,36 | 96,65 | 96,72 | 95,36 | 97,43 | 96,65 |
| **[56]** | *LGMB487* | 95,86 | 96,79 | 96,5 | 94,58 | 95,51 | 96,22 | 96,79 | 95,86 | 95,79 | 97,29 | 96,36 | 96,08 | 96,79 | 97,5 |
| **[57]** | *LGMB466* | 96,08 | 97 | 96,72 | 94,79 | 96,22 | 96,79 | 96,93 | 96,08 | 96,01 | 97,5 | 96,58 | 96,65 | 97 | 98,36 |
| **[58]** | *Streptomyces glauciniger* | 89,51 | 89,8 | 90,09 | 87,52 | 89,8 | 90,66 | 89,44 | 89,44 | 89,23 | 90,01 | 89,87 | 90,66 | 89,66 | 90,51 |

Table S1- Similarity percentage matrix for the gene 16S rRNA, of LGMB466 and 487- *Actinomadura* genus

|  |  | **[29]** | **[30]** | **[31]** | **[32]** | **[33]** | **[34]** | **[35]** | **[36]** | **[37]** | **[38]** | **[39]** | **[40]** | **[41]** | **[42]** |
| --- | --- | --- | --- | --- | --- | --- | --- | --- | --- | --- | --- | --- | --- | --- | --- |
| [30] | Actinomadura rifamycini | 94,15 |  |  |  |  |  |  |  |  |  |  |  |  |  |
| [31] | Actinomadura rayongensis | 95,65 | 93,87 |  |  |  |  |  |  |  |  |  |  |  |  |
| [32] | Actinomadura napierensis | 95,93 | 95,65 | 95,51 |  |  |  |  |  |  |  |  |  |  |  |
| [33] | Actinomadura rugatobispora | 94,29 | 94,58 | 94,51 | 95,86 |  |  |  |  |  |  |  |  |  |  |
| [34] | Actinomadura rubrobrunea | 96,5 | 93,65 | 94,44 | 94,72 | 93,58 |  |  |  |  |  |  |  |  |  |
| [35] | Actinomadura scrupuli | 94,51 | 94,01 | 93,37 | 95,08 | 93,44 | 93,3 |  |  |  |  |  |  |  |  |
| [36] | Actinomadura umbrina | 94,08 | 93,22 | 94,08 | 95,08 | 93,65 | 92,87 | 94,94 |  |  |  |  |  |  |  |
| [37] | Actinomadura sputi | 94,72 | 94,15 | 94,37 | 96,15 | 94,72 | 94,58 | 93,72 | 93,94 |  |  |  |  |  |  |
| [38] | Actinomadura viridilutea | 96,43 | 93,58 | 94,37 | 94,65 | 93,58 | 99,43 | 93,22 | 92,8 | 94,51 |  |  |  |  |  |
| [39] | Actinomadura sediminis | 93,94 | 96,15 | 94,58 | 96,22 | 94,58 | 93,79 | 93,37 | 93,51 | 95,15 | 93,58 |  |  |  |  |
| [40] | Actinomadura yumaensis | 94,58 | 94,29 | 94,37 | 96,43 | 97 | 93,37 | 94,29 | 94,51 | 95,15 | 93,3 | 94,44 |  |  |  |
| [41] | Actinomadura vinacea | 94,94 | 94,29 | 95,08 | 96,08 | 98,15 | 93,79 | 94,15 | 94,44 | 95,29 | 93,72 | 94,79 | 98,15 |  |  |
| [42] | Actinomadura xylanilytica | 96,29 | 95,01 | 96,36 | 97,72 | 95,65 | 94,72 | 95,29 | 95,51 | 95,29 | 94,65 | 95,58 | 96,5 | 96,29 |  |
| [43] | Actinomadura livida | 95,01 | 94,15 | 94,58 | 96,22 | 96,36 | 93,87 | 94,51 | 94,65 | 95,51 | 93,79 | 94,15 | 97,57 | 97,43 | 96,15 |
| [44] | Actinomadura hibisca | 96,5 | 94,94 | 95,58 | 96,01 | 95,29 | 95,08 | 94,51 | 93,79 | 94,58 | 95,01 | 94,72 | 95,72 | 95,79 | 96,86 |
| [45] | Actinomadura meridiana | 94,08 | 94,79 | 94,72 | 95,93 | 94,86 | 93,01 | 93,87 | 94,22 | 94,15 | 92,94 | 95,36 | 95,36 | 95,44 | 95,86 |
| [46] | Actinomadura fulvescens | 95,93 | 95,44 | 95,15 | 97,15 | 96,01 | 94,72 | 95,08 | 94,29 | 95,15 | 94,65 | 95,36 | 96,22 | 96,5 | 97,43 |
| [47] | Actinomadura chibensis | 95,08 | 94,01 | 94,15 | 96,36 | 94,72 | 93,87 | 94,08 | 95,15 | 94,79 | 93,79 | 94,29 | 96,29 | 95,58 | 96,01 |
| [48] | Actinomadura catellatispora | 93,01 | 92,01 | 92,72 | 94,15 | 94,01 | 91,87 | 92,44 | 92,58 | 93,44 | 91,8 | 92,08 | 95,22 | 95,08 | 94,08 |

Table S1- Similarity percentage matrix for the gene 16S rRNA, of LGMB466 and 487- *Actinomadura* genus

|  |  | **[29]** | **[30]** | **[31]** | **[32]** | **[33]** | **[34]** | **[35]** | **[36]** | **[37]** | **[38]** | **[39]** | **[40]** | **[41]** | **[42]** |
| --- | --- | --- | --- | --- | --- | --- | --- | --- | --- | --- | --- | --- | --- | --- | --- |
| [49] | *Actinomadura pelletieri* | 93,94 | 94,29 | 94,08 | 95,29 | 94,58 | 92,94 | 93,44 | 93,72 | 94,51 | 92,87 | 94,65 | 94,86 | 94,58 | 95,08 |
| [50] | *Actinomadura oligospora* | 96,15 | 94,51 | 95,29 | 95,79 | 95,08 | 95,15 | 94,37 | 93,3 | 94,37 | 95,08 | 93,87 | 95,01 | 95,29 | 95,79 |
| [51] | *Actinomadura rudentiformis* | 95,79 | 95,65 | 94,58 | 96,72 | 95,93 | 94,86 | 94,72 | 94,79 | 95,08 | 94,79 | 95,51 | 95,93 | 96,15 | 96,65 |
| [52] | *Actinomadura rupiterrae* | 95,22 | 93,51 | 94,58 | 94,44 | 94,29 | 94,37 | 93,65 | 93,65 | 94,22 | 94,29 | 93,3 | 94,58 | 94,94 | 94,44 |
| [53] | *Actinomadura verrucospora* | 94,72 | 96,08 | 95,44 | 96,86 | 96,29 | 93,37 | 94,37 | 94,29 | 94,86 | 93,3 | 95,58 | 96,29 | 96,22 | 97,15 |
| [54] | *Actinomadura viridis* | 95,01 | 94,29 | 95,29 | 96,08 | 97,72 | 93,44 | 94,29 | 94,44 | 95,08 | 93,37 | 94,94 | 98 | 99,36 | 96,43 |
| [55] | *Actinomadura syzygii* | 96,01 | 94,51 | 95,01 | 96,86 | 95,65 | 94,01 | 94,01 | 94,79 | 94,86 | 93,94 | 95,29 | 96,08 | 96,08 | 97 |
| [56] | *LGMB487* | 96,15 | 95,58 | 94,51 | 97,15 | 95,36 | 94,58 | 95,79 | 95,15 | 95,08 | 94,51 | 94,79 | 95,79 | 95,65 | 96,93 |
| [57] | *LGMB466* | 96,86 | 95,79 | 95,22 | 97,43 | 95,29 | 95,29 | 96,22 | 95,58 | 95,29 | 95,22 | 95,01 | 95,72 | 95,58 | 97,72 |
| [58] | *Streptomyces glauciniger* | 90,09 | 89,37 | 89,44 | 90,23 | 88,73 | 90,3 | 90,51 | 89,44 | 88,09 | 90,16 | 88,87 | 88,8 | 88,66 | 90,37 |

Table S1- Similarity percentage matrix for the gene 16S rRNA, of LGMB466 and 487- *Actinomadura* genus

|  |  | **[43]** | **[44]** | **[45]** | **[46]** | **[47]** | **[48]** | **[49]** | **[50]** | **[51]** | **[52]** | **[53]** | **[54]** | **[55]** | **[56]** | **[57]** | **[58]** |
| --- | --- | --- | --- | --- | --- | --- | --- | --- | --- | --- | --- | --- | --- | --- | --- | --- | --- |
| [43] | *Actinomadura livida* | 0 |  |  |  |  |  |  |  |  |  |  |  |  |  |  |  |
| [44] | *Actinomadura hibisca* | 95,15 |  |  |  |  |  |  |  |  |  |  |  |  |  |  |  |
| [45] | *Actinomadura meridiana* | 95,58 | 95,22 |  |  |  |  |  |  |  |  |  |  |  |  |  |  |
| [46] | *Actinomadura fulvescens* | 96,43 | 97,5 | 96,79 |  |  |  |  |  |  |  |  |  |  |  |  |  |
| [47] | *Actinomadura chibensis* | 96,15 | 95,44 | 96,08 | 96,29 |  |  |  |  |  |  |  |  |  |  |  |  |
| [48] | *Actinomadura catellatispora* | 97,65 | 93,08 | 93,51 | 94,37 | 94,15 |  |  |  |  |  |  |  |  |  |  |  |
| [49] | *Actinomadura pelletieri* | 95,36 | 94,58 | 96,65 | 95,58 | 96,22 | 93,3 |  |  |  |  |  |  |  |  |  |  |
| [50] | *Actinomadura oligospora* | 95,29 | 96,58 | 95,01 | 96,65 | 95,36 | 93,22 | 94,79 |  |  |  |  |  |  |  |  |  |
| [51] | *Actinomadura rudentiformis* | 95,86 | 97,15 | 96,43 | 98,64 | 96,08 | 93,79 | 95,79 | 95,93 |  |  |  |  |  |  |  |  |
| [52] | *Actinomadura rupiterrae* | 94,72 | 95,79 | 94,08 | 95,01 | 94,44 | 92,72 | 93,65 | 96,72 | 95,72 |  |  |  |  |  |  |  |
| [53] | *Actinomadura verrucospora* | 95,79 | 95,72 | 96,15 | 96,79 | 95,51 | 93,72 | 95,15 | 94,86 | 96,15 | 93,65 |  |  |  |  |  |  |
| [54] | *Actinomadura viridis* | 97,5 | 95,86 | 95,58 | 96,43 | 95,58 | 95,15 | 94,51 | 95,01 | 96,01 | 94,86 | 96,22 |  |  |  |  |  |
| [55] | *Actinomadura syzygii* | 96,01 | 96,5 | 96,79 | 97,29 | 98,57 | 94,01 | 96,58 | 95,51 | 96,86 | 94,58 | 96,5 | 96,01 |  |  |  |  |

Table S1- Similarity percentage matrix for the gene 16S rRNA, of LGMB466 and 487- *Actinomadura* genus

|  |  | **[43]** | **[44]** | **[45]** | **[46]** | **[47]** | **[48]** | **[49]** | **[50]** | **[51]** | **[52]** | **[53]** | **[54]** | **[55]** | **[56]** | **[57]** | **[58]** |
| --- | --- | --- | --- | --- | --- | --- | --- | --- | --- | --- | --- | --- | --- | --- | --- | --- | --- |
| [56] | *LGMB487* | 96,01 | 96,5 | 95,58 | 97,57 | 95,86 | 93,94 | 95,36 | 96,5 | 98 | 95,65 | 95,86 | 95,65 | 96,29 |  |  |  |
| [57] | *LGMB466* | 95,79 | 96,5 | 95,44 | 97,29 | 95,72 | 93,72 | 95,22 | 96,29 | 97,72 | 95,44 | 95,93 | 95,58 | 96,15 | **98,86** |  |  |
| [58] | *Streptomyces glauciniger* | 89,02 | 89,87 | 89,23 | 90,16 | 88,73 | 87,02 | 88,37 | 89,44 | 89,94 | 89,23 | 89,51 | 88,73 | 89,16 | 90,37 | 90,8 | 0 |

Table S2- Similarity percentage matrix for the gene 16S rRNA, of LGMB491 - *Aeromicrobium* genus

|  |  | **[1]** | **[2]** | **[3]** | **[4]** | **[5]** | **[6]** | **[7]** | **[8]** | **[9]** | **[10]** | **[11]** | **[12]** | **[13]** | **[14]** |
| --- | --- | --- | --- | --- | --- | --- | --- | --- | --- | --- | --- | --- | --- | --- | --- |
| **[1]** | *Aeromicrobium alkaliterrae* |  |  |  |  |  |  |  |  |  |  |  |  |  |  |
| **[2]** | *Aeromicrobium erythreum* | 97,6 |  |  |  |  |  |  |  |  |  |  |  |  |  |
| **[3]** | *Aeromicrobium fastidiosum* | 97,6 | 98,13 |  |  |  |  |  |  |  |  |  |  |  |  |
| **[4]** | *Aeromicrobium flavum* | 96,33 | 96,33 | 96,03 |  |  |  |  |  |  |  |  |  |  |  |
| **[5]** | *Aeromicrobium ginsengisoli* | 98,43 | 97,38 | 97,75 | 96,86 |  |  |  |  |  |  |  |  |  |  |
| **[6]** | *Aeromicrobium halocynthiae* | 97,38 | 97,46 | 96,11 | 96,11 | 97,68 |  |  |  |  |  |  |  |  |  |
| **[7]** | *Aeromicrobium marinum* | 98,13 | 96,93 | 97,46 | 96,26 | 99,1 | 97,38 |  |  |  |  |  |  |  |  |
| **[8]** | *Aeromicrobium massiliense* | 96,26 | 96,26 | 95,88 | 95,66 | 95,96 | 95,06 | 95,21 |  |  |  |  |  |  |  |
| **[9]** | *Aeromicrobium panaciterrae* | 97,68 | 96,78 | 97,01 | 96,93 | 98,95 | 96,93 | 98,2 | 95,96 |  |  |  |  |  |  |
| **[10]** | *Aeromicrobium tamlense* | 96,33 | 96,48 | 96,11 | 98,88 | 96,71 | 96,41 | 96,41 | 95,43 | 96,63 |  |  |  |  |  |
| **[11]** | *Aeromicrobium camelliae* | 96,63 | 96,78 | 96,41 | 95,36 | 95,88 | 95,88 | 95,43 | 95,58 | 95,28 | 95,73 |  |  |  |  |
| **[12]** | *Nocardioides albus* | 91,84 | 91,77 | 92,37 | 92,07 | 91,99 | 91,17 | 91,39 | 92,81 | 92,22 | 92,14 | 92,14 |  |  |  |
| **[13]** | *Aeromicrobium ponti* | 97,83 | 98,2 | 96,78 | 95,66 | 97,23 | 97,31 | 97,23 | 95,73 | 96,48 | 96,11 | 95,96 | 91,32 |  |  |
| **[14]** | *LGMB491* | 98,2 | 98,35 | 97,08 | 96,41 | 97,9 | 97,9 | 97,75 | 95,81 | 97,16 | 96,18 | 95,88 | 91,17 | **99,25** |  |

Table S3- Similarity percentage matrix for the gene 16S rRNA, of LGMB471 - *Microbacterium*sp.

|  |  | **[1]** | **[2]** | **[3]** | **[4]** | **[5]** | **[6]** | **[7]** | **[8]** |
| --- | --- | --- | --- | --- | --- | --- | --- | --- | --- |
| **[1]** | *Agrococcus jenensis* | 0 | 93,42 | 93 | 91,67 | 93,21 | 93,11 | 92,9 | 92,08 |
| **[2]** | *LGMB471* | 93,42 | 0 | 98,66 | 97,63 | 99,07 | 98,97 | 98,87 | 97,94 |
| **[3]** | *Microbacterium liquefaciens* | 93 | 98,66 | 0 | 97,84 | 99,59 | 99,49 | 98,77 | 98,25 |
| **[4]** | *Microbacterium luteolum* | 91,67 | 97,63 | 97,84 | 0 | 98,25 | 98,15 | 98,15 | 97,74 |
| **[5]** | *Microbacterium maritypicum* | 93,21 | 99,07 | 99,59 | 98,25 | 0 | 99,9 | 99,18 | 98,66 |
| **[6]** | *Microbacterium oxydans* | 93,11 | 98,97 | 99,49 | 98,15 | 99,9 | 0 | 99,07 | 98,56 |
| **[7]** | *Microbacterium paraoxydans* | 92,9 | 98,87 | 98,77 | 98,15 | 99,18 | 99,07 | 0 | 98,46 |
| **[8]** | *Microbacterium saperdae* | 92,08 | 97,94 | 98,25 | 97,74 | 98,66 | 98,56 | 98,46 | 0 |

Table S4- Similarity percentage matrix for the gene 16S rRNA, of LGMB461 and LGMB465 - *Microbispora* genus

|  |  | **[1]** | **[2]** | **[3]** | **[4]** | **[5]** | **[6]** | **[7]** | **[8]** | **[9]** | **[10]** | **[11]** | **[12]** | **[13]** | **[14]** |
| --- | --- | --- | --- | --- | --- | --- | --- | --- | --- | --- | --- | --- | --- | --- | --- |
| [1] | *LGMB461* |  |  |  |  |  |  |  |  |  |  |  |  |  |  |
| [2] | *LGMB465* | **99,84** |  |  |  |  |  |  |  |  |  |  |  |  |  |
| [3] | *Microbispora chromogenes* | 97,63 | 97,78 |  |  |  |  |  |  |  |  |  |  |  |  |
| [4] | *Microbispora indica* | 99,37 | 99,53 | 97,63 |  |  |  |  |  |  |  |  |  |  |  |
| [5] | *Microbispora karnatakensis* | 99,21 | 99,37 | 97,15 | 99,21 |  |  |  |  |  |  |  |  |  |  |
| [6] | *Microbispora parva* | 98,58 | 98,73 | 97,31 | 98,58 | 98,73 |  |  |  |  |  |  |  |  |  |
| [7] | *Microbispora thermodiastatica* | 97,47 | 97,63 | 95,89 | 97,47 | 97,63 | 97,63 |  |  |  |  |  |  |  |  |
| [8] | *Microbispora thermorosea* | 96,04 | 96,2 | 97,31 | 96,04 | 96,2 | 95,89 | 96,68 |  |  |  |  |  |  |  |
| [9] | *Microbispora amethystogenes* | 98,42 | 98,58 | 96,99 | 98,73 | 98,58 | 98,89 | 97,47 | 95,41 |  |  |  |  |  |  |
| [10] | *Microbispora corallina* | 97,94 | 98,1 | 97,78 | 97,94 | 98,1 | 97,78 | 96,84 | 97,15 | 97,31 |  |  |  |  |  |
| [11] | *Microbispora mesophila* | 92,25 | 92,41 | 91,46 | 92,56 | 92,09 | 91,61 | 91,3 | 90,82 | 91,77 | 92,56 |  |  |  |  |
| [12] | *Microbispora aerata* | 98,1 | 98,26 | 96,52 | 98,1 | 98,26 | 98,26 | 99,21 | 96,84 | 98,1 | 97,47 | 91,61 |  |  |  |
| [13] | *Microbispora rosea* | 98,73 | 98,89 | 96,99 | 99,37 | 98,58 | 97,94 | 97,31 | 95,57 | 98,1 | 97,31 | 92,25 | 97,78 |  |  |
| [14] | *Microbispora siamensis* | 96,68 | 96,84 | 98,1 | 96,68 | 96,84 | 96,68 | 95,57 | 96,68 | 96,04 | 97,15 | 90,35 | 96,2 | 96,04 |  |
| [15] | *LGMB250* | 99,68 | 99,84 | 97,94 | 99,68 | 99,21 | 98,58 | 97,47 | 96,04 | 98,73 | 97,94 | 92,56 | 98,1 | 99,05 | 96,68 |
| [16] | *LGMB251* | 99,53 | 99,68 | 97,78 | 99,53 | 99,05 | 98,42 | 97,31 | 96,04 | 98,58 | 97,78 | 92,56 | 97,94 | 98,89 | 96,52 |
| [17] | *LGMB252* | 69,78 | 69,94 | 67,88 | 69,62 | 69,62 | 68,67 | 68,04 | 67,09 | 68,83 | 68,04 | 64,08 | 68,67 | 69,15 | 67,72 |
| [18] | *LGMB253* | 69,94 | 70,09 | 68,35 | 69,78 | 69,78 | 69,15 | 68,2 | 67,25 | 69,15 | 68,2 | 64,4 | 68,83 | 69,3 | 67,88 |
| [19] | *LGMB255* | 99,21 | 99,37 | 97,47 | 99,21 | 98,73 | 98,1 | 96,99 | 95,57 | 98,26 | 97,47 | 92,25 | 97,63 | 98,58 | 96,2 |
| [20] | *LGMB256* | 97,47 | 97,63 | 99,21 | 97,47 | 96,99 | 96,68 | 95,73 | 97,15 | 96,52 | 97,63 | 91,14 | 96,36 | 96,84 | 97,63 |
| [21] | *LGMB257* | 95,09 | 95,25 | 96,99 | 95,09 | 94,62 | 94,62 | 93,67 | 95,25 | 94,15 | 95,57 | 89,4 | 94,3 | 94,46 | 95,41 |
| [22] | *LGMB258* | 99,05 | 99,21 | 96,99 | 98,73 | 98,58 | 97,94 | 96,84 | 95,41 | 97,78 | 97,31 | 91,61 | 97,47 | 98,1 | 96,04 |
| [23] | *LGMB259* | **99,84** | **100** | 97,78 | 99,53 | 99,37 | 98,73 | 97,63 | 96,2 | 98,58 | 98,1 | 92,41 | 98,26 | 98,89 | 96,84 |
| [24] | *LGMB260* | 99,68 | 99,84 | 97,94 | 99,68 | 99,21 | 98,58 | 97,47 | 96,04 | 98,73 | 97,94 | 92,56 | 98,1 | 99,05 | 96,68 |
| [25] | *LGMB261* | 99,53 | 99,68 | 97,78 | 99,53 | 99,05 | 98,42 | 97,31 | 95,89 | 98,58 | 97,78 | 92,41 | 97,94 | 98,89 | 96,52 |
| [26] | *Actinomadura echinospora* | 93,83 | 93,99 | 93,35 | 93,99 | 93,51 | 93,67 | 93,51 | 92,72 | 93,83 | 93,99 | 93,35 | 93,99 | 93,51 | 92,09 |

Table S4- Similarity percentage matrix for the gene 16S rRNA, of LGMB461 and LGMB465 - *Microbispora* genus

|  |  | **[15]** | **[16]** | **[17]** | **[18]** | **[19]** | **[20]** | **[21]** | **[22]** | **[23]** | **[24]** | **[25]** | **[26]** |
| --- | --- | --- | --- | --- | --- | --- | --- | --- | --- | --- | --- | --- | --- |
| [16] | LGMB251 | 99,84 |  |  |  |  |  |  |  |  |  |  |  |
| [17] | LGMB252 | 69,94 | 70,09 |  |  |  |  |  |  |  |  |  |  |
| [18] | LGMB253 | 70,09 | 70,25 | 99,21 |  |  |  |  |  |  |  |  |  |
| [19] | LGMB255 | 99,53 | 99,37 | 69,62 | 69,78 |  |  |  |  |  |  |  |  |
| [20] | LGMB256 | 97,78 | 97,63 | 67,72 | 67,88 | 97,31 |  |  |  |  |  |  |  |
| [21] | LGMB257 | 95,41 | 95,41 | 65,98 | 66,3 | 94,94 | 97,63 |  |  |  |  |  |  |
| [22] | LGMB258 | 99,05 | 98,89 | 69,3 | 69,46 | 98,58 | 97,78 | 95,41 |  |  |  |  |  |
| [23] | LGMB259 | 99,84 | 99,68 | 69,94 | 70,09 | 99,37 | 97,63 | 95,25 | 99,21 |  |  |  |  |
| [24] | LGMB260 | 100 | 99,84 | 69,94 | 70,09 | 99,53 | 97,78 | 95,41 | 99,05 | 99,84 |  |  |  |
| [25] | LGMB261 | 99,84 | 99,68 | 69,78 | 69,94 | 99,37 | 97,63 | 95,25 | 98,89 | 99,68 | 99,84 |  |  |
| [26] | *Actinomadura echinospora* | 94,15 | 93,99 | 64,4 | 64,72 | 93,83 | 93,04 | 91,14 | 93,35 | 93,99 | 94,15 | 93,99 |  |

Table S5- Similarity percentage matrix for the gene 16S rRNA, of LGMB485 - *Micrococcus* genus

|  |  | **[1]** | **[2]** | **[3]** | **[4]** | **[5]** | **[6]** | **[7]** | **[8]** | **[9]** | **[10]** | **[11]** |
| --- | --- | --- | --- | --- | --- | --- | --- | --- | --- | --- | --- | --- |
| [1] | *LGMB 485* |  |  |  |  |  |  |  |  |  |  |  |
| [2] | *Micrococcus flavus* | 98,75 |  |  |  |  |  |  |  |  |  |  |
| [3] | *Micrococcus antarticus* | 99,17 | 97,92 |  |  |  |  |  |  |  |  |  |
| [4] | *Micrococcus lylae* | 98,96 | 97,71 | 98,12 |  |  |  |  |  |  |  |  |
| [5] | *Micrococcus aloeverae* | 100 | 98,75 | 99,17 | 98,96 |  |  |  |  |  |  |  |
| [6] | *Micrococcus cohnii* | 99,17 | 97,92 | 99,17 | 98,54 | 99,17 |  |  |  |  |  |  |
| [7] | *Micrococcus luteus* | 99,58 | 98,33 | 98,75 | 98,54 | 99,58 | 98,75 |  |  |  |  |  |
| [8] | *Micrococcus yunnanensis* | 100 | 98,75 | 99,17 | 98,96 | 100 | 99,17 | 99,58 |  |  |  |  |
| [9] | *Micrococcus terreus* | 97,92 | 97,08 | 97,92 | 97,71 | 97,92 | 98,33 | 97,92 | 97,92 |  |  |  |
| [10] | *Micrococcus endophyticus* | 99,79 | 98,54 | 98,96 | 98,75 | 99,79 | 98,96 | 99,38 | 99,79 | 97,71 |  |  |
| [11] | *Citricoccus parietis* | 97,71 | 96,46 | 97,71 | 97,5 | 97,71 | 97,71 | 97,29 | 97,71 | 97,71 | 97,5 | 0 |

|  |  | **[1]** | **[2]** | **[3]** | **[4]** | **[5]** | **[6]** | **[7]** | **[8]** | **[9]** | **[10]** | **[11]** | **[12]** |
| --- | --- | --- | --- | --- | --- | --- | --- | --- | --- | --- | --- | --- | --- |
| **[1]** | *LGMB 482* |  |  |  |  |  |  |  |  |  |  |  |  |
| **[2]** | *Sphaerisporangium melleum* | 99,4 |  |  |  |  |  |  |  |  |  |  |  |
| **[3]** | *Sphaerisporangium cinnabarium* | 98,89 | 98,49 |  |  |  |  |  |  |  |  |  |  |
| **[4]** | *Sphaerisporangium aureirubrum* | 96,18 | 95,98 | 96,68 |  |  |  |  |  |  |  |  |  |
| **[5]** | *Sphaerisporangium rufum* | 97,48 | 97,18 | 98,19 | 96,28 |  |  |  |  |  |  |  |  |
| **[6]** | *Sphaerisporangium album* | 96,48 | 96,38 | 96,98 | 96,48 | 97,69 |  |  |  |  |  |  |  |
| **[7]** | *Sphaerisporangium flaviroseum* | 96,98 | 97,18 | 97,89 | 96,68 | 97,18 | 97,38 |  |  |  |  |  |  |
| **[8]** | *Sphaerisporangium krabiense* | 97,79 | 98,19 | 97,69 | 96,18 | 97,38 | 97,08 | 97,08 |  |  |  |  |  |
| **[9]** | *Sphaerisporangium rubeum* | 96,18 | 96,18 | 96,68 | 98,29 | 96,78 | 96,78 | 96,38 | 96,28 |  |  |  |  |
| **[10]** | *Sphaerisporangium siamense* | 97,59 | 97,38 | 96,88 | 95,98 | 97,38 | 97,28 | 96,18 | 98,09 | 96,08 |  |  |  |
| **[11]** | *Sphaerisporangium viridalbum* | 97,69 | 98,09 | 96,98 | 95,77 | 96,78 | 96,28 | 97,59 | 97,28 | 96,18 | 97,28 |  |  |
| **[12]** | *Planobispora rosea* | 95,37 | 95,77 | 95,37 | 93,76 | 94,67 | 94,16 | 94,87 | 95,67 | 94,27 | 94,37 | 95,67 |  |

Table S6- Similarity percentage matrix for the gene 16S rRNA, of LGMB482 - *Sphaerisporangium* genus

Table S7- Similarity percentage matrix for the gene 16S rRNA, of LGMB483 - *Streptomyces* genus

|  |  | **[1]** | **[2]** | **[3]** | **[4]** | **[5]** | **[6]** | **[7]** | **[8]** | **[9]** | **[10]** | **[11]** | **[12]** | **[13]** | **[14]** |
| --- | --- | --- | --- | --- | --- | --- | --- | --- | --- | --- | --- | --- | --- | --- | --- |
| **[1]** | *LGMB483* |  |  |  |  |  |  |  |  |  |  |  |  |  |  |
| **[2]** | *Streptomyces prasinosporus* | 97,7 |  |  |  |  |  |  |  |  |  |  |  |  |  |
| **[3]** | *Streptomyces hyderabadensis* | 97,84 | 97,12 |  |  |  |  |  |  |  |  |  |  |  |  |
| **[4]** | *Streptomyces parvulus* | 98,63 | 97,7 | 98,85 |  |  |  |  |  |  |  |  |  |  |  |
| **[5]** | *Streptomyces spinoverrucosus* | 98,56 | 97,92 | 98,13 | 98,78 |  |  |  |  |  |  |  |  |  |  |
| **[6]** | *Streptomyces lomondensis* | 98,99 | 97,84 | 98,63 | 99,21 | 98,71 |  |  |  |  |  |  |  |  |  |
| **[7]** | *Streptomyces coerulescens* | 99,28 | 97,63 | 98,06 | 98,99 | 98,78 | 99,21 |  |  |  |  |  |  |  |  |
| **[8]** | *Streptomyces bellus* | 99,28 | 97,63 | 98,06 | 98,99 | 98,78 | 99,21 | 100 |  |  |  |  |  |  |  |
| **[9]** | *Streptomyces lusitanus* | 99,57 | 98,06 | 98,2 | 98,99 | 98,99 | 99,35 | 99,28 | 99,28 |  |  |  |  |  |  |
| **[10]** | *Streptomyces thermocarboxydus* | 99,86 | 97,7 | 97,84 | 98,63 | 98,56 | 98,99 | 99,28 | 99,28 | 99,57 |  |  |  |  |  |
| **[11]** | *Streptomyces speibonae* | 98,71 | 98,06 | 98,13 | 98,63 | 98,35 | 98,71 | 98,78 | 98,78 | 98,99 | 98,71 |  |  |  |  |
| **[12]** | *Streptomyces longispororuber* | 99,07 | 98,13 | 98,06 | 98,99 | 98,49 | 99,07 | 99,21 | 99,21 | 99,35 | 99,07 | 99,42 |  |  |  |
| **[13]** | *Streptomyces viridodiastaticus* | 98,78 | 97,63 | 98,35 | 98,71 | 98,35 | 98,71 | 99,14 | 99,14 | 99,07 | 98,78 | 99,07 | 99,42 |  |  |
| **[14]** | *Streptomyces albogriseolus* | 98,78 | 97,63 | 98,35 | 98,71 | 98,35 | 98,71 | 99,14 | 99,14 | 99,07 | 98,78 | 99,07 | 99,42 | 100 |  |
| **[15]** | *Streptomyces erythrogriseus* | 98,56 | 98,06 | 97,7 | 98,49 | 98,35 | 98,49 | 98,92 | 98,92 | 98,85 | 98,56 | 98,99 | 99,21 | 99,21 | 99,21 |
| **[16]** | *Streptomyces griseoincarnatus* | 98,56 | 98,06 | 97,7 | 98,49 | 98,35 | 98,49 | 98,92 | 98,92 | 98,85 | 98,56 | 98,99 | 99,21 | 99,21 | 99,21 |
| **[17]** | *Streptomyces griseosporeus* | 98,42 | 97,77 | 97,56 | 98,27 | 98,27 | 98,2 | 98,42 | 98,42 | 98,56 | 98,42 | 98,2 | 98,49 | 98,2 | 98,2 |
| **[18]** | *Streptomyces chromofuscus* | 98,2 | 98,63 | 97,99 | 98,42 | 98,63 | 98,56 | 98,42 | 98,42 | 98,56 | 98,2 | 98,78 | 98,56 | 98,2 | 98,2 |
| **[19]** | *Streptomyces glomeratus* | 98,06 | 97,92 | 97,92 | 98,35 | 98,13 | 98,49 | 98,2 | 98,2 | 98,42 | 98,06 | 98,63 | 98,49 | 98,27 | 98,27 |
| **[20]** | *Streptomyces chiangmaiensis* | 98,13 | 97,77 | 97,92 | 98,56 | 98,2 | 98,63 | 98,27 | 98,27 | 98,35 | 98,13 | 98,49 | 98,42 | 98,06 | 98,06 |
| **[21]** | *Streptomyces lannensis* | 97,77 | 97,41 | 97,56 | 98,06 | 97,84 | 97,99 | 97,63 | 97,63 | 97,99 | 97,77 | 98,35 | 98,13 | 97,77 | 97,77 |
| **[22]** | *Streptomyces leeuwenhoekii* | 98,27 | 97,48 | 98,13 | 98,63 | 98,42 | 98,35 | 98,2 | 98,2 | 98,63 | 98,27 | 98,49 | 98,42 | 98,35 | 98,35 |
| **[23]** | *Streptomyces mexicanus* | 97,77 | 97,77 | 97,92 | 98,2 | 98,27 | 98,2 | 97,92 | 97,92 | 98,06 | 97,77 | 98,2 | 97,92 | 97,77 | 97,77 |
| **[24]** | *Streptomyces albus subsp albus* | 95,61 | 96,12 | 95,54 | 95,4 | 95,4 | 95,54 | 95,26 | 95,26 | 95,69 | 95,54 | 95,69 | 95,69 | 96,05 | 96,05 |
| **[25]** | *Streptomyces somaliensis* | 98,13 | 97,41 | 97,41 | 98,06 | 97,99 | 97,99 | 97,92 | 97,92 | 98,2 | 98,06 | 98,2 | 97,92 | 97,77 | 97,77 |

Table S7- Similarity percentage matrix for the gene 16S rRNA, of LGMB483 - *Streptomyces* genus

|  |  | **[15]** | **[16]** | **[17]** | **[18]** | **[19]** | **[20]** | **[21]** | **[22]** | **[23]** | **[24]** | **[25]** |
| --- | --- | --- | --- | --- | --- | --- | --- | --- | --- | --- | --- | --- |
| **[15]** | *Streptomyces erythrogriseus* |  |  |  |  |  |  |  |  |  |  |  |
| **[16]** | *Streptomyces griseoincarnatus* | 100 |  |  |  |  |  |  |  |  |  |  |
| **[17]** | *Streptomyces griseosporeus* | 97,99 | 97,99 |  |  |  |  |  |  |  |  |  |
| **[18]** | *Streptomyces chromofuscus* | 98,13 | 98,13 | 98,2 |  |  |  |  |  |  |  |  |
| **[19]** | *Streptomyces glomeratus* | 98,2 | 98,2 | 98,42 | 98,71 |  |  |  |  |  |  |  |
| **[20]** | *Streptomyces chiangmaiensis* | 97,99 | 97,99 | 98,06 | 98,99 | 98,63 |  |  |  |  |  |  |
| **[21]** | *Streptomyces lannensis* | 97,7 | 97,7 | 97,7 | 98,35 | 98,42 | 98,63 |  |  |  |  |  |
| **[22]** | *Streptomyces leeuwenhoekii* | 98,27 | 98,27 | 98,35 | 98,35 | 98,49 | 98,56 | 98,35 |  |  |  |  |
| **[23]** | *Streptomyces mexicanus* | 97,7 | 97,7 | 97,92 | 98,99 | 98,56 | 98,35 | 97,77 | 98,42 |  |  |  |
| **[24]** | *Streptomyces albus subsp albus* | 96,05 | 96,05 | 95,9 | 95,97 | 95,76 | 95,54 | 95,11 | 95,97 | 96,62 |  |  |
| **[25]** | *Streptomyces somaliensis* | 97,7 | 97,7 | 98,56 | 98,2 | 98,27 | 98,13 | 97,77 | 98,56 | 98,13 | 95,9 |  |

Table S8- Similarity percentage matrix for the gene 16S rRNA, of LGMB479–*Williamsia* genus

|  |  | **[1]** | **[2]** | **[3]** | **[4]** | **[5]** | **[6]** | **[7]** | **[8]** | **[9]** | **[10]** | **[11]** |
| --- | --- | --- | --- | --- | --- | --- | --- | --- | --- | --- | --- | --- |
| **[1]** | *Williamsia deligens* | 0 | 95,25 | 95,17 | 95,77 | 98,14 | 95,99 | 97,47 | 97,55 | 95,99 | 97,4 | 91,16 |
| **[2]** | *Williamsia faeni* | 95,25 | 0 | 98,22 | 97,99 | 96,06 | 98,22 | 95,77 | 94,28 | 94,06 | 94,28 | 91,9 |
| **[3]** | *Williamsia limnetica* | 95,17 | 98,22 | 0 | 98,74 | 96,29 | 98,96 | 96,58 | 94,87 | 94,95 | 94,87 | 92,12 |
| **[4]** | *Williamsia marianensis* | 95,77 | 97,99 | 98,74 | 0 | 96,88 | 99,78 | 96,58 | 95,1 | 95,02 | 95,02 | 91,6 |
| **[5]** | *Williamsia maris* | 98,14 | 96,06 | 96,29 | 96,88 | 0 | 97,1 | 99,33 | 96,66 | 96,51 | 96,51 | 91,83 |
| **[6]** | *Williamsia muralis* | 95,99 | 98,22 | 98,96 | 99,78 | 97,1 | 0 | 96,81 | 95,32 | 95,17 | 95,25 | 91,83 |
| **[7]** | *Williamsia phyllosphaerae* | 97,47 | 95,77 | 96,58 | 96,58 | 99,33 | 96,81 | 0 | 96,58 | 96,66 | 96,43 | 92,35 |
| **[8]** | *Williamsia serinedens* | 97,55 | 94,28 | 94,87 | 95,1 | 96,66 | 95,32 | 96,58 | 0 | 95,77 | 99,85 | 92,05 |
| **[9]** | *Williamsia sterculiae* | 95,99 | 94,06 | 94,95 | 95,02 | 96,51 | 95,17 | 96,66 | 95,77 | 0 | 95,77 | 92,05 |
| **[10]** | *LGMB479* | 97,4 | 94,28 | 94,87 | 95,02 | 96,51 | 95,25 | 96,43 | 99,85 | 95,77 | 0 | 92,05 |
| **[11]** | *Mycobacterium tuberculosis* | 91,16 | 91,9 | 92,12 | 91,6 | 91,83 | 91,83 | 92,35 | 92,05 | 92,05 | 92,05 | 0 |

Table S9. Dry weight obtained from extractsof endophytic actinomycetes in two media (SG and R5A) and two temperatures (28 °C and 36 °C).

|  | **SG** | | **R5A** | |
| --- | --- | --- | --- | --- |
|  | **28 °C** | **36 °C** | **28 °C** | **36 °C** |
| **LGMB461**  ***Microbispora* sp.** | 326.00 | 9.00 | 43.00 | 11.00 |
| **LGMB465**  ***Microbispora* sp.** | 17.00 | 48.00 | 19.00 | 13.00 |
| **LGMB466 *Actinomadura* sp.** | 12.00 | 13.00 | 17.00 | 65.00 |
| **LGMB471 *Microbacterium* sp.** | 11.00 | 25.00 | 12.00 | 17.00 |
| **LGMB479**  ***Williamsia* sp.** | 139.00 | 11.00 | 9.00 | 8.00 |
| **LGMB482 *Sphaerisporangium* sp.** | 12.00 | 14.00 | 16.00 | 20.00 |
| **LGMB483**  ***Streptomyces* sp.** | 130.00 | 4.00 | 92.00 | 199.00 |
| **LGMB485**  ***Micrococcus* sp.** | 8.00 | 16.00 | 146.00 | 41.00 |
| **LGMB487 *Actinomadura* sp.** | 29.00 | 151.00 | 21.00 | 86.00 |
| **LGMB491 *Aeromicrobium* sp.** | 10.00 | 63.00 | 71.00 | 174.00 |

Values in mg
